# Supplementary material for: Tributylphosphine-catalyzed aziridine-based cycloaddition polymerization toward thiacyclic polymers
Source: Royal Society of Chemistry journal article supplement (doi:10.1039/d2py00569g), 2022-01-01
Supplement: d2py00569g1.pdf [file d2py00569g1.pdf]

## *Supporting Information*

# **Tributylphosphine-Catalyzed Aziridine-Based Cycloaddition Polymerization toward Thiacyclic Polymers**

Zhi Zhou<sup>a</sup>, Ying Wang<sup>a</sup>, Linlin Zhu<sup>a</sup>, Dai Dang<sup>a</sup>, and Zhen Zhang<sup>\*a,b</sup>

<sup>a</sup>School of Chemical Engineering and Light Industry, Guangdong University of Technology,  
Guangzhou 510006, P. R. China

<sup>b</sup>Key Laboratory of Polymer Processing Engineering (South China University of Technology),  
Ministry of Education, Guangzhou 510641, P. R. China.

\*E-mail: [zhen.zhang@gdut.edu.cn](mailto:zhen.zhang@gdut.edu.cn)

## 1. Supporting Schemes and Figures

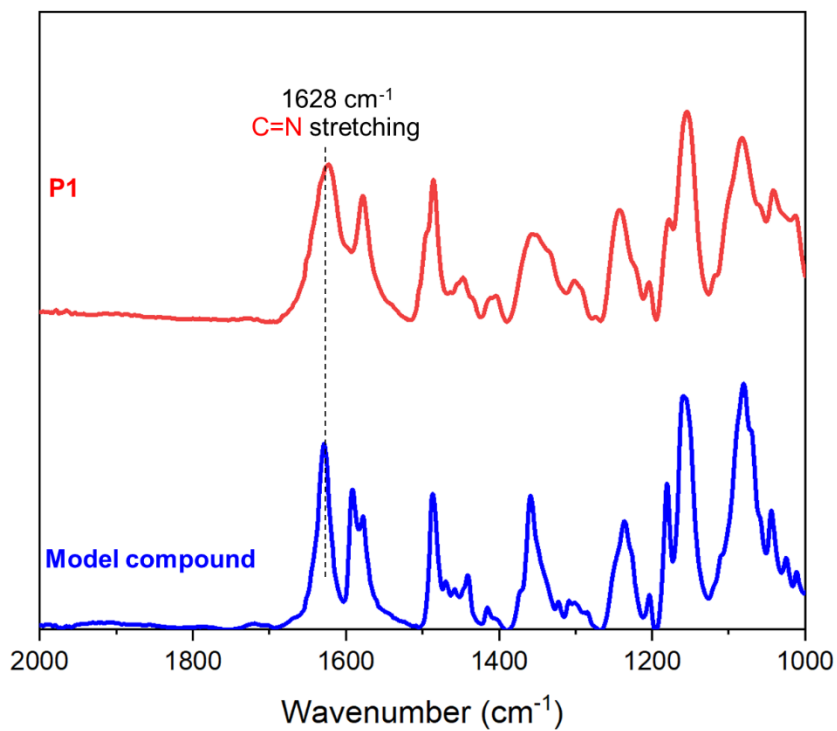

**Fig. S1** FT-IR spectra of **P1** and the model compound (Scheme 2).

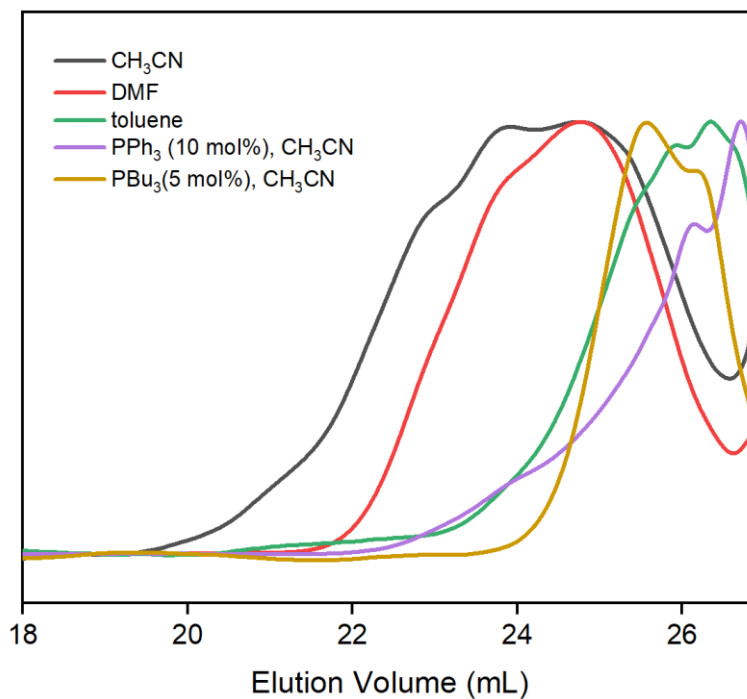

**Fig. S2** SEC traces (DMF,  $60 \text{ }^\circ\text{C}$ ) of polymers synthesized in Table 1.

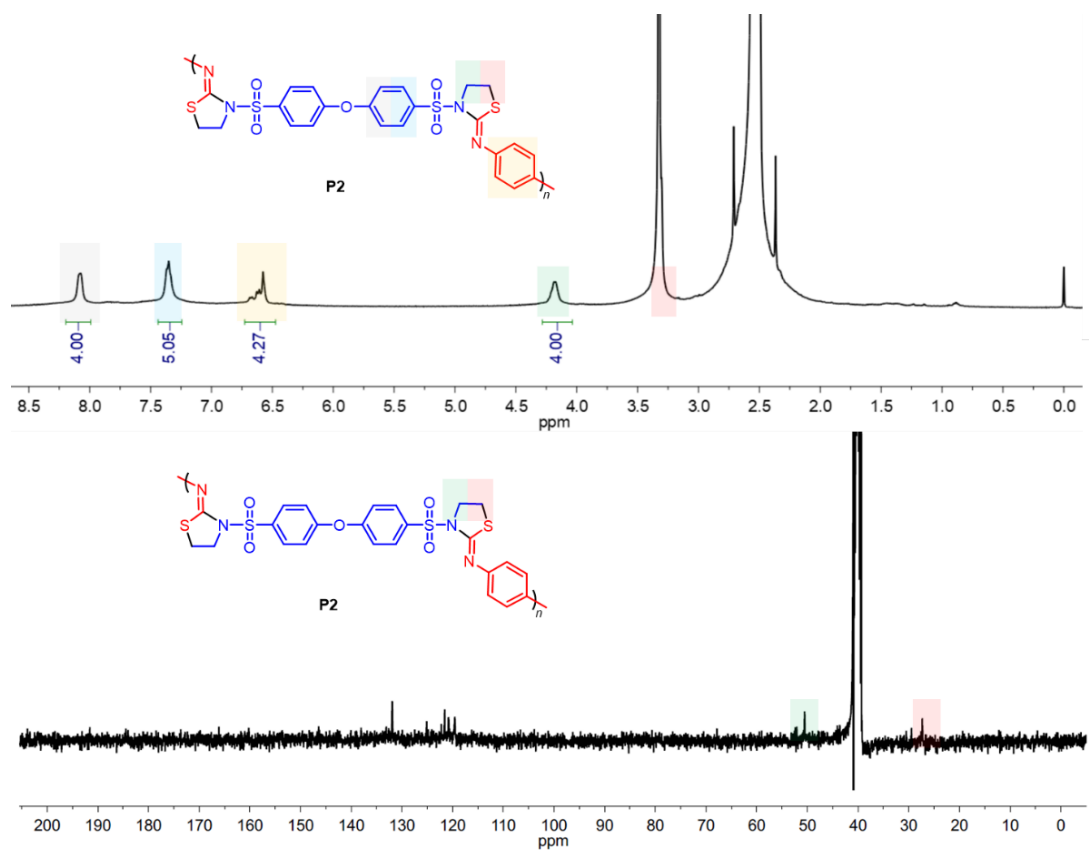

**Fig. S3**  $^1\text{H}$  NMR (400 MHz,  $\text{DMSO-}d_6$ , 25 °C) and  $^{13}\text{C}$  NMR (150 MHz,  $\text{DMSO-}d_6$ , 25 °C) spectra of **P2**.

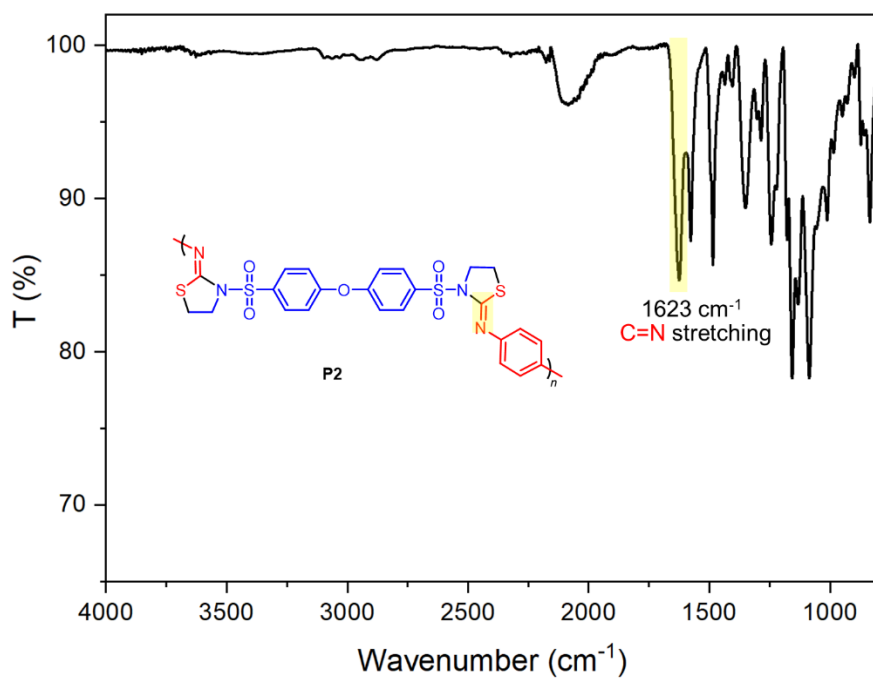

**Fig. S4** FT-IR spectrum of **P2**.

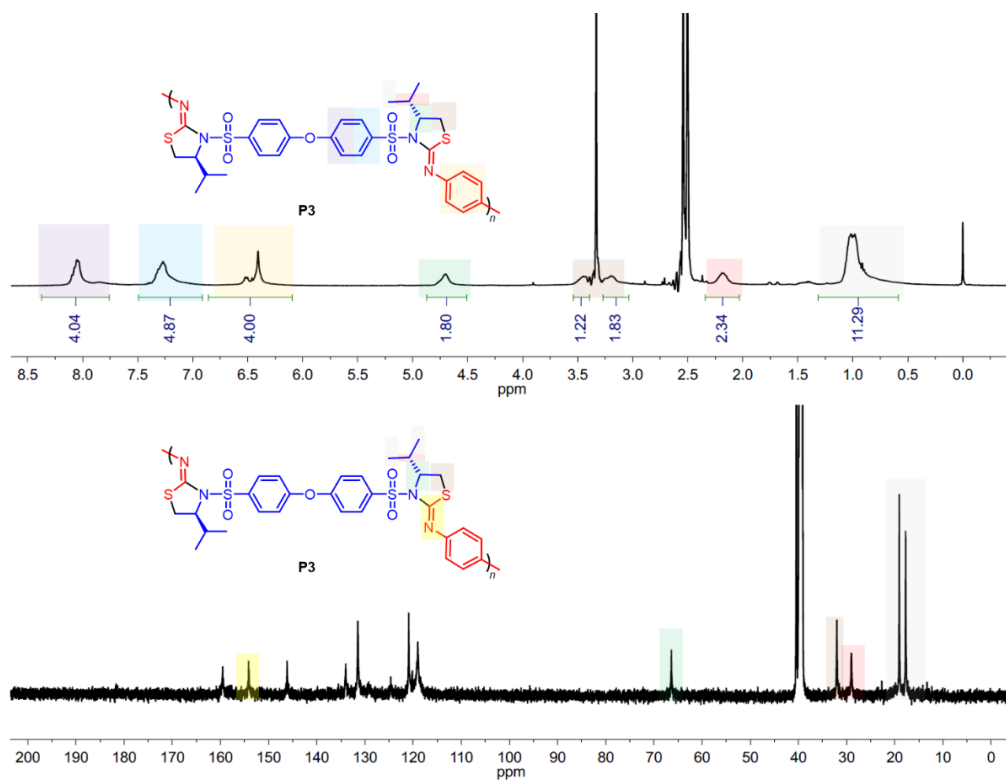

**Fig. S5**  $^1\text{H}$  NMR (400 MHz,  $\text{DMSO-}d_6$ , 25 °C) and  $^{13}\text{C}$  NMR (150 MHz,  $\text{DMSO-}d_6$ , 25 °C) spectra of **P3**.

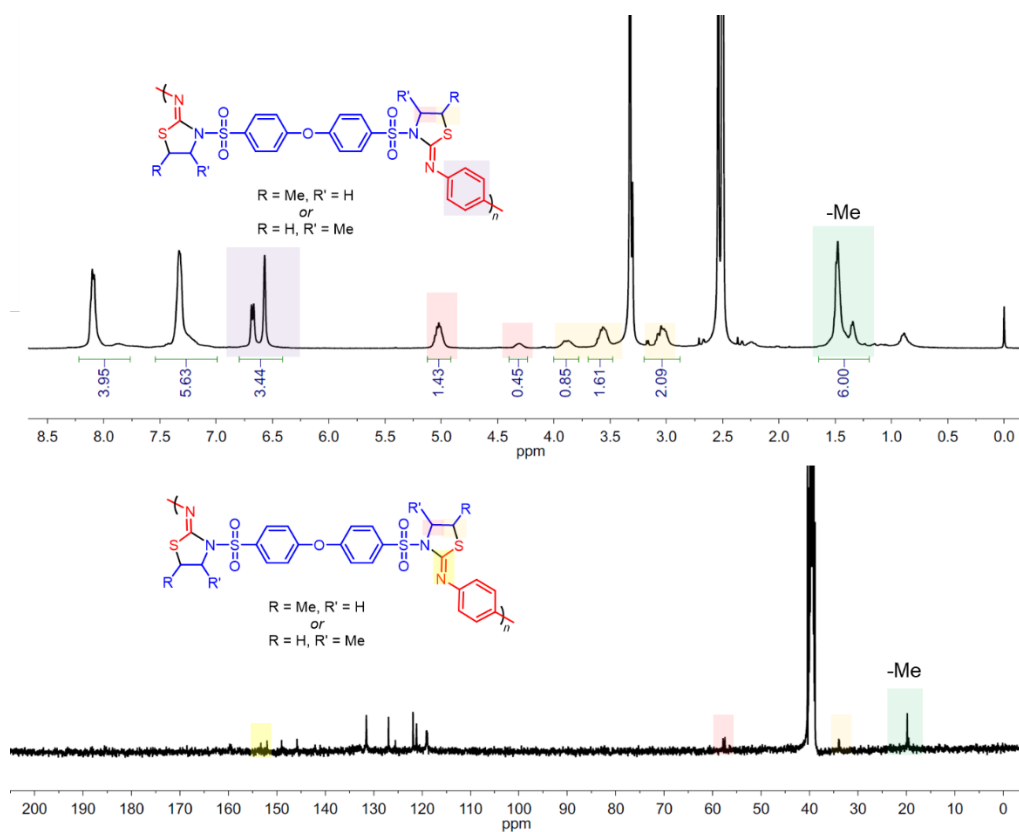

**Fig. S6**  $^1\text{H}$  NMR (400 MHz,  $\text{DMSO-}d_6$ , 25 °C) and  $^{13}\text{C}$  NMR (150 MHz,  $\text{DMSO-}d_6$ , 25 °C) spectra of **P4**.

### Scheme S1. Model Cycloaddition Reaction

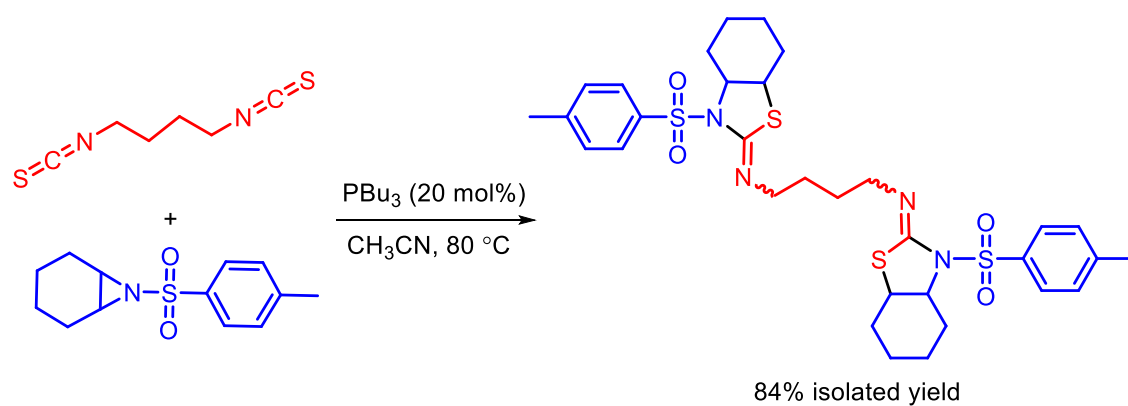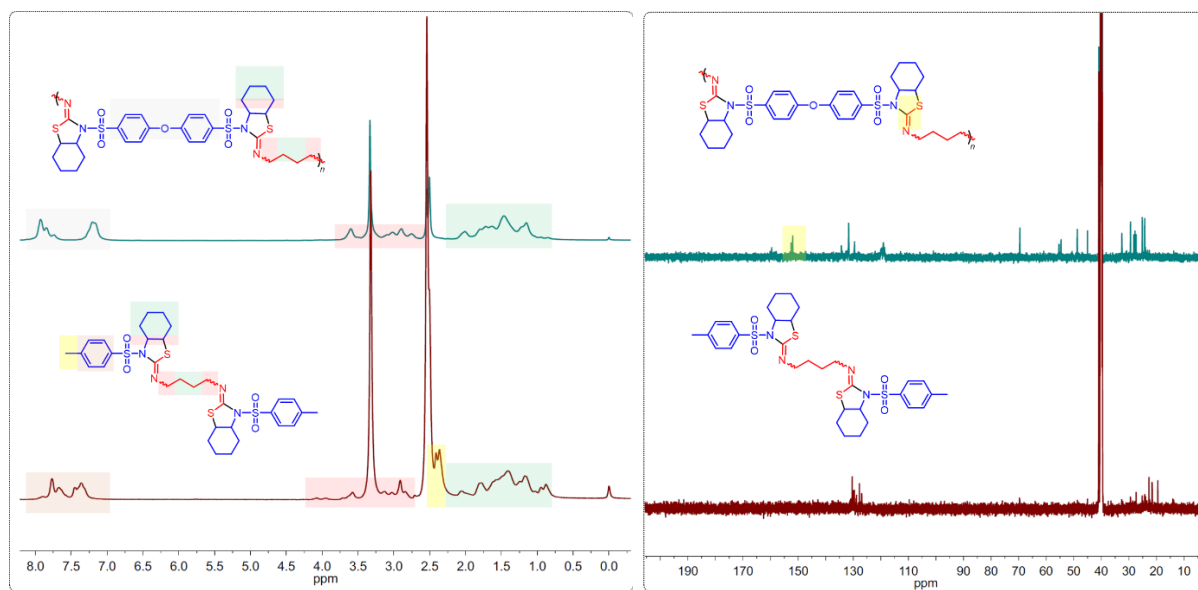

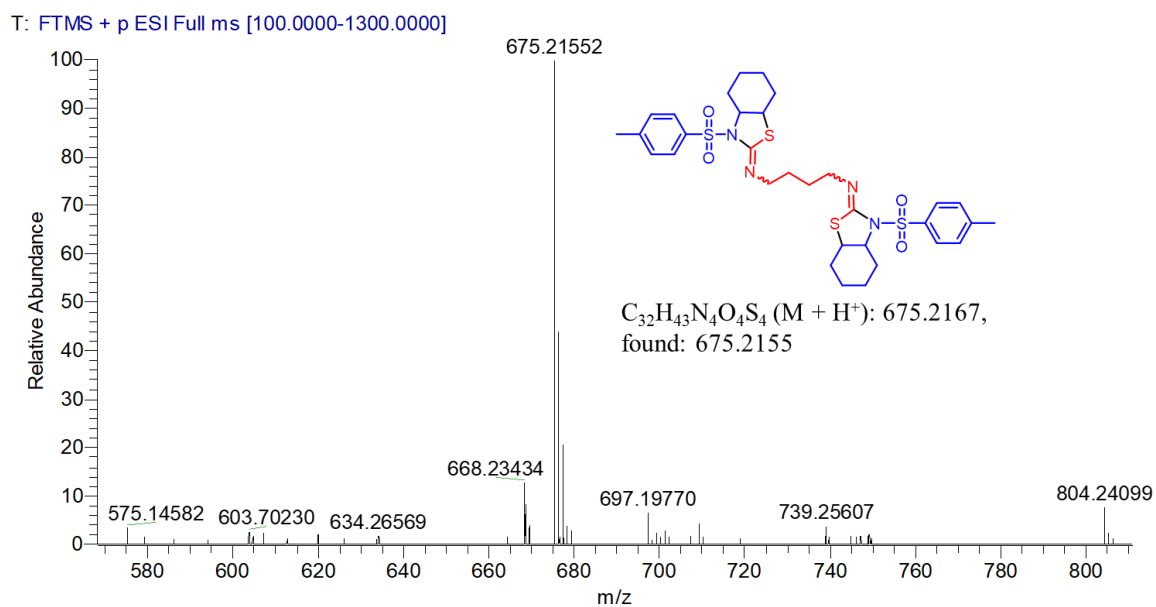

**Fig. S8** HRMS spectrum of the model compound (Scheme S1).

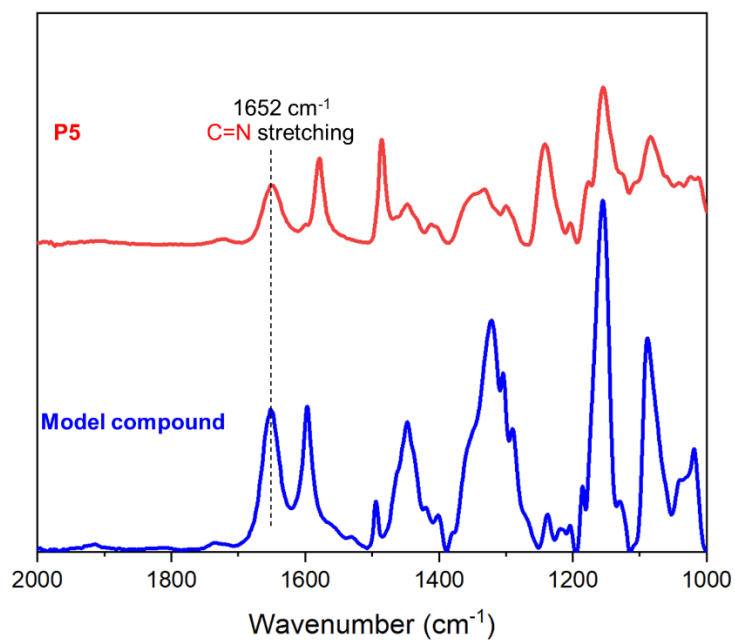

**Fig. S9** FT-IR spectrum of **P5** and the model compound (Scheme S1).

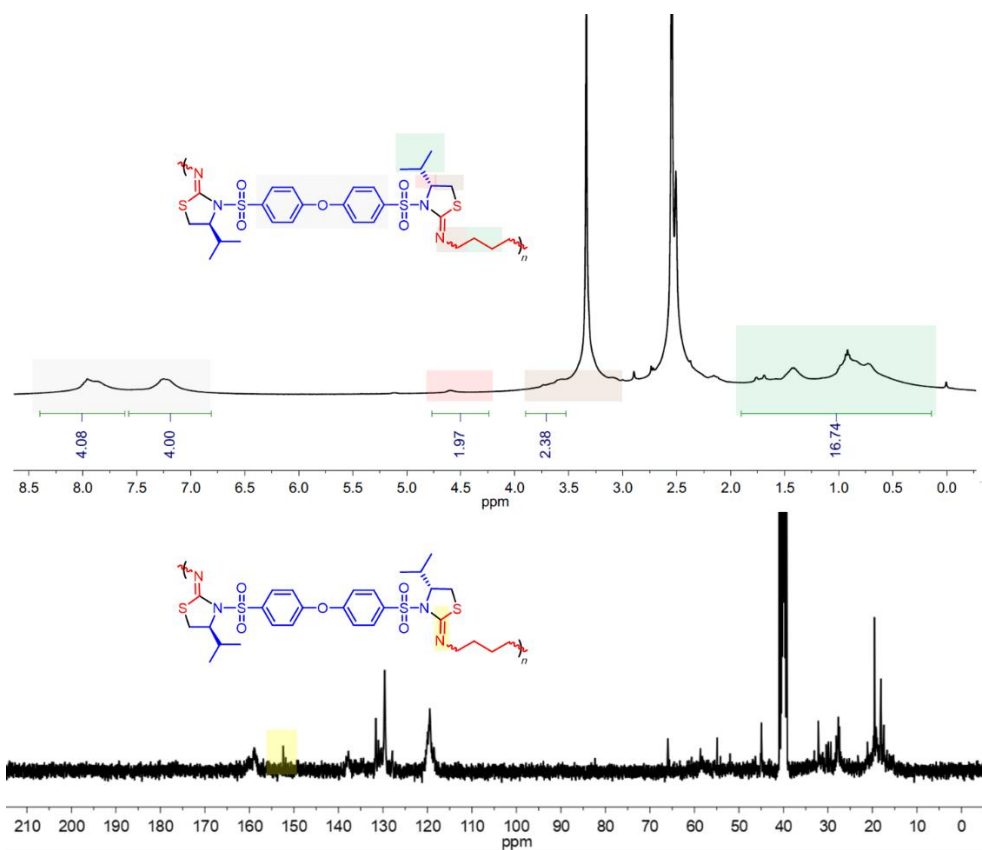

**Fig. S10**  $^1\text{H}$  NMR (400 MHz,  $\text{DMSO-}d_6$ , 25 °C) and  $^{13}\text{C}$  NMR (150 MHz,  $\text{DMSO-}d_6$ , 25 °C) spectra of **P6**.

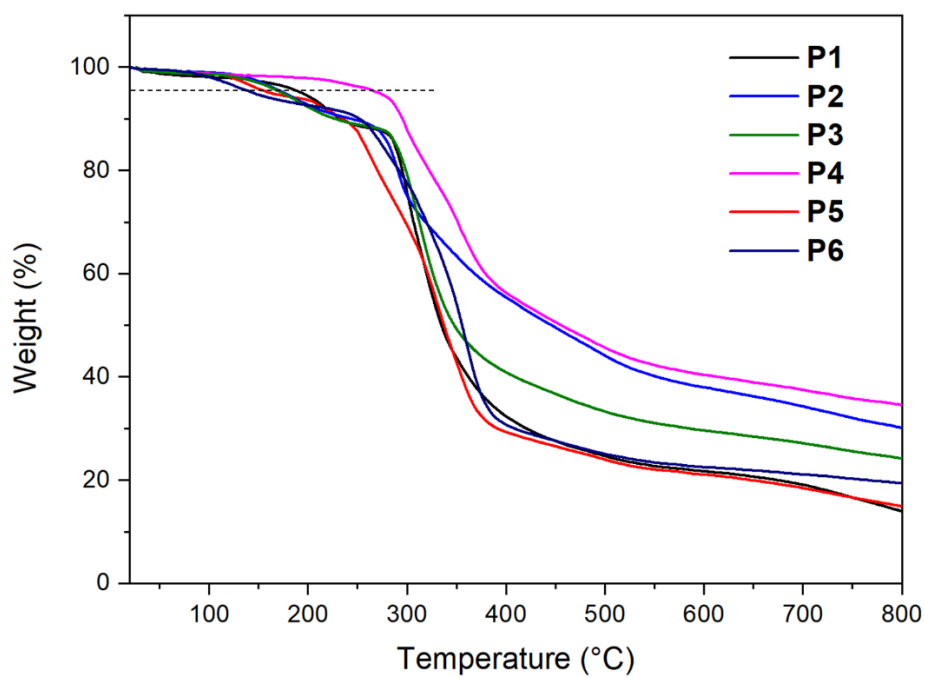

**Fig. S11** The TG curves of **P1-P6**.

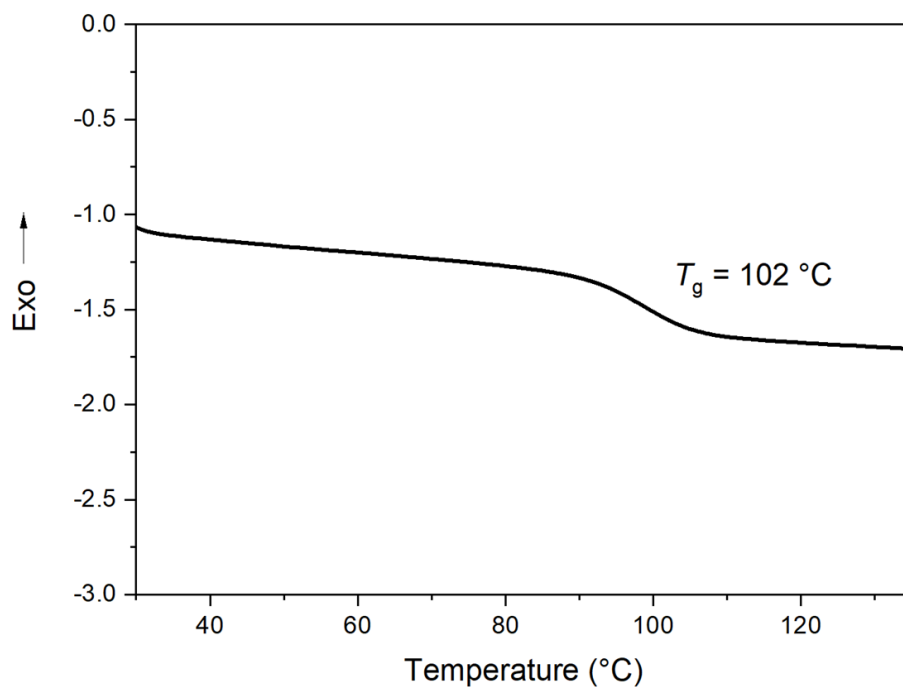

**Fig. S12** The DSC curve of **P5**.

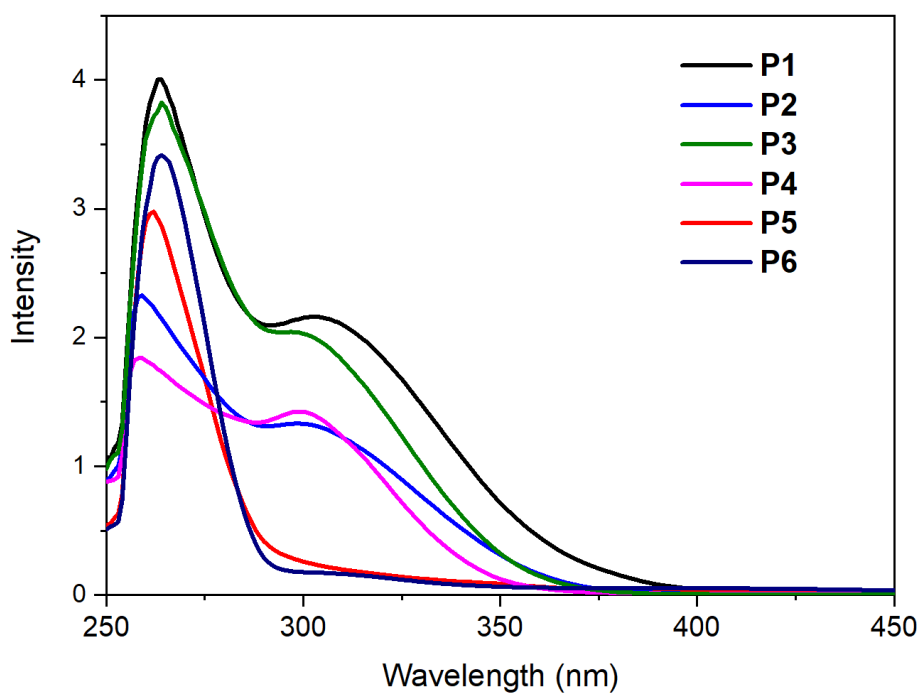

**Fig. S13** The UV-vis spectra of **P1-P6**.



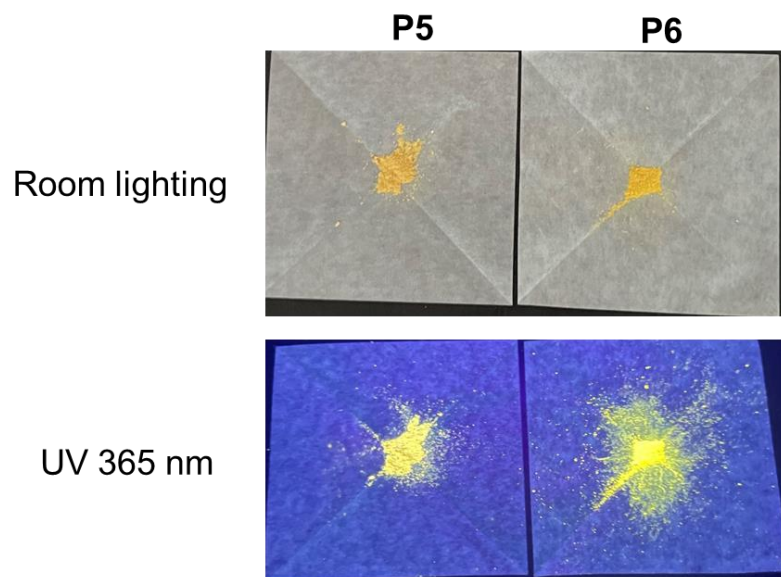

**Fig. S14** The photos of **P5** and **P6** powders taken under room lighting and irradiated with a UV lamp (365 nm).

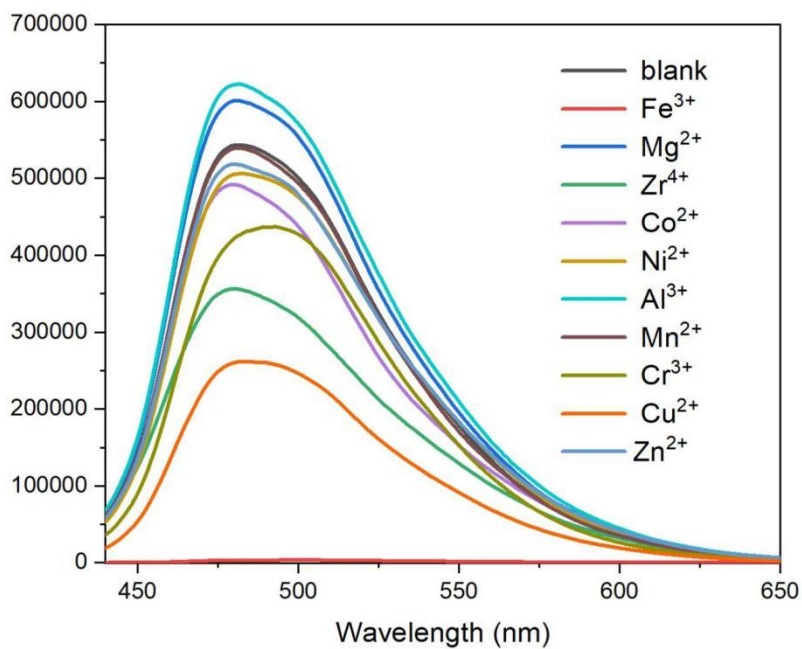

**Fig. S15** PL spectra of **P6** in DMSO/water mixtures with different metal ions.

## 2. Characterization Data

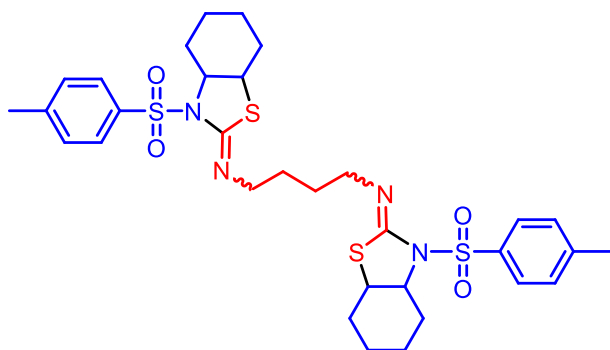

**FT-IR** (neat): 2924 , 2853, 1635, 1447, 1347, 1179, 1083, 1018, 805, 699, 654, 543  $\text{cm}^{-1}$ ;

**$^1\text{H}$  NMR** (400 MHz,  $(\text{CD}_3)_2\text{SO}$ , TMS):  $\delta$  0.68-2.06 (20H, m), 2.26-2.45 (6H, m), 2.73-3.20 (6H, m), 3.49-4.24 (2H, m), 7.02-8.04 (8H, m).

**$^{13}\text{C}$  NMR** (100 MHz,  $(\text{CD}_3)_2\text{SO}$ , TMS): 130.4, 123.0, 129.6 , 128.8 , 127.7 , 126.9 , 27.3 , 25.1 , 24.3 , 24.2 , 24.1, 23.9 , 22.7 , 21.6 , 21.5 , 19.5.

**HRMS  $[\text{M} + \text{H}^+]$** : Calcd. for  $\text{C}_{38}\text{H}_{38}\text{N}_4\text{O}_5\text{S}_4$ : 675.2122, found: 675.2155.

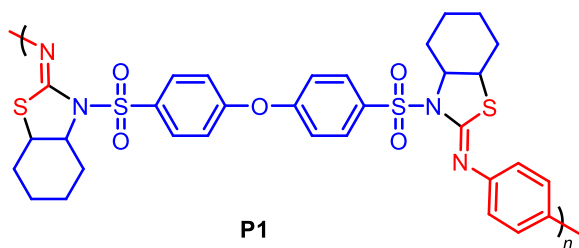

**P1**

**FT-IR** (neat): 2935 , 2864, 1619, 1566, 1483, 1354, 1237, 1153, 1081, 1036, 829  $\text{cm}^{-1}$ ;

**$^1\text{H}$  NMR** (400 MHz,  $(\text{CD}_3)_2\text{SO}$ , TMS):  $\delta$  1.07-2.07 (16H, m), 2.93 (2H, br), 3.80 (2H, br), 6.19-6.67 (4H, m), 7.05-7.42 (4H, m), 7.74-8.17 (4H, m).

**$^{13}\text{C}$  NMR** (125 MHz,  $(\text{CD}_3)_2\text{SO}$ , TMS):  $\delta$  159.5, 154.5, 145.8, 133.3, 131.3, 120.8, 118.9, 69.9, 48.4, 32.2, 28.6, 24.6, 23.7.

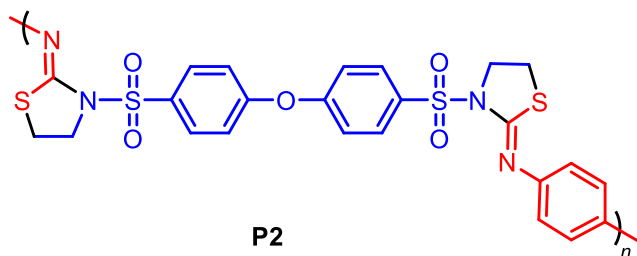

**FT-IR** (neat): 2930, 1627, 1573, 1337, 1253, 1157, 1085, 836, 692, 550  $\text{cm}^{-1}$ ;

**$^1\text{H}$  NMR** (400 MHz,  $(\text{CD}_3)_2\text{SO}$ , TMS):  $\delta$  4.04-4.29 (4H, m), 6.50-6.74 (4H, m), 7.26-7.45 (4H, m), 8.00-8.19(4H, m).

**$^{13}\text{C}$  NMR** (125 MHz,  $(\text{CD}_3)_2\text{SO}$ , TMS):  $\delta$  132.1, 125.1, 122.2, 121.5, 120.8, 119.7, 119.6, 50.6, 27.3.

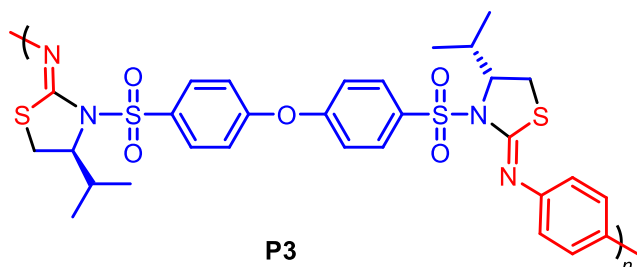

**FT-IR** (neat): 2962, 1618, 1570, 1491, 1347, 1244, 1157, 1085, 839  $\text{cm}^{-1}$ ;

**$^1\text{H}$  NMR** (400 MHz,  $(\text{CD}_3)_2\text{SO}$ , TMS):  $\delta$  0.6-1.31 (10H, m), 2.03-2.34 (2H, m), 3.03-3.27 (2H, m), 3.41-3.53 (2H, m), 4.50-4.87 (2H, m), 6.09-6.84 (4H, m), 6.92-7.49 (4H, m), 7.77-8.37(4H, m);

**$^{13}\text{C}$  NMR** (125 MHz,  $(\text{CD}_3)_2\text{SO}$ , TMS):  $\delta$  159.5, 154.2, 146.2, 134.0, 131.5, 120.9, 119.0, 66.4, 32.0, 29.01, 19.0, 17.8.

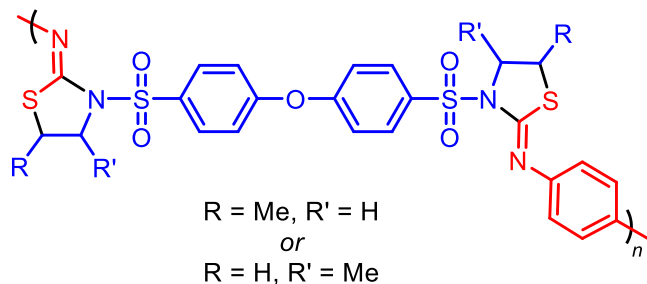

**P4**

**FT-IR** (neat): 2974, 1626, 1578, 1487, 1352, 1243, 1152, 1082, 833, 693, 553  $\text{cm}^{-1}$ ;

**$^1\text{H}$  NMR** (400 MHz,  $(\text{CD}_3)_2\text{SO}$ , TMS):  $\delta$  1.19-1.65 (6H, br), 2.88-3.19 (2H, m), 3.47-3.65 (1H, m), 3.77-4.00 (1H, m), 4.23-4.40 (1H, m), 4.90-5.11 (1H, m), 6.40-6.81 (4H, m), 6.99-6.54 (4H, m), 7.77-8.23 (4H, m).

**$^{13}\text{C}$  NMR** (125 MHz,  $(\text{CD}_3)_2\text{SO}$ , TMS):  $\delta$  159.7, 159.4, 153.3, 152.0, 149.0, 145.8, 120.9, 131.5, 126.9, 125.5, 121.9, 121.2, 119.1, 57.9, 57.5, 34.0, 33.8, 19.8, 19.5.

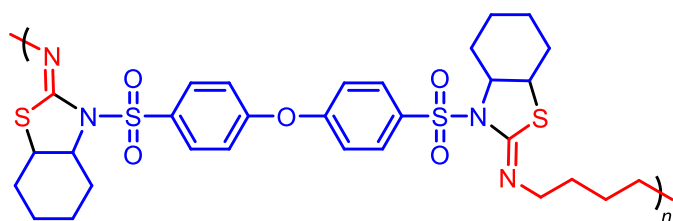

**P5**

**FT-IR** (neat): 2930, 2858, 1657, 1578, 1483, 1244, 1149, 1085, 696, 560  $\text{cm}^{-1}$ ;

**$^1\text{H}$  NMR** (400 MHz,  $(\text{CD}_3)_2\text{SO}$ , TMS):  $\delta$  0.93-2.23 (20H, m), 2.63-3.26 (6H, m), 3.54-3.72 (2H, m), 7.01-7.46 (4H, m), 7.71-8.03 (4H, m).

**$^{13}\text{C}$  NMR** (125 MHz,  $(\text{CD}_3)_2\text{SO}$ , TMS):  $\delta$  159.6, 152.5, 151.9, 134.3, 131.6, 129.5, 119.1, 69.5, 55.2, 54.6, 48.7, 45.0, 32.5, 29.4, 28.1, 27.8, 27.3, 25.1, 24.2.

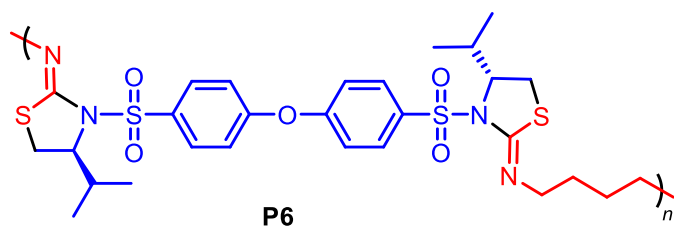

**FT-IR** (neat): 2965, 2098, 1580, 1480, 1320, 1237, 1150, 1087, 875, 688, 557 $\text{cm}^{-1}$ ;

**$^1\text{H}$  NMR** (400 MHz,  $(\text{CD}_3)_2\text{SO}$ , TMS):  $\delta$  0.14-1.90 (16H, m), 3.51-3.89 (2H, m), 4.23-4.75 (2H, m), 6.80-7.57 (4H, m), 7.61-8.40 (4H, m).

**$^{13}\text{C}$  NMR** (125 MHz,  $(\text{CD}_3)_2\text{SO}$ , TMS):  $\delta$  130.61 , 121.35 , 45.85 , 44.5 , 32.6 , 29.4 , 19.1, 18.8.

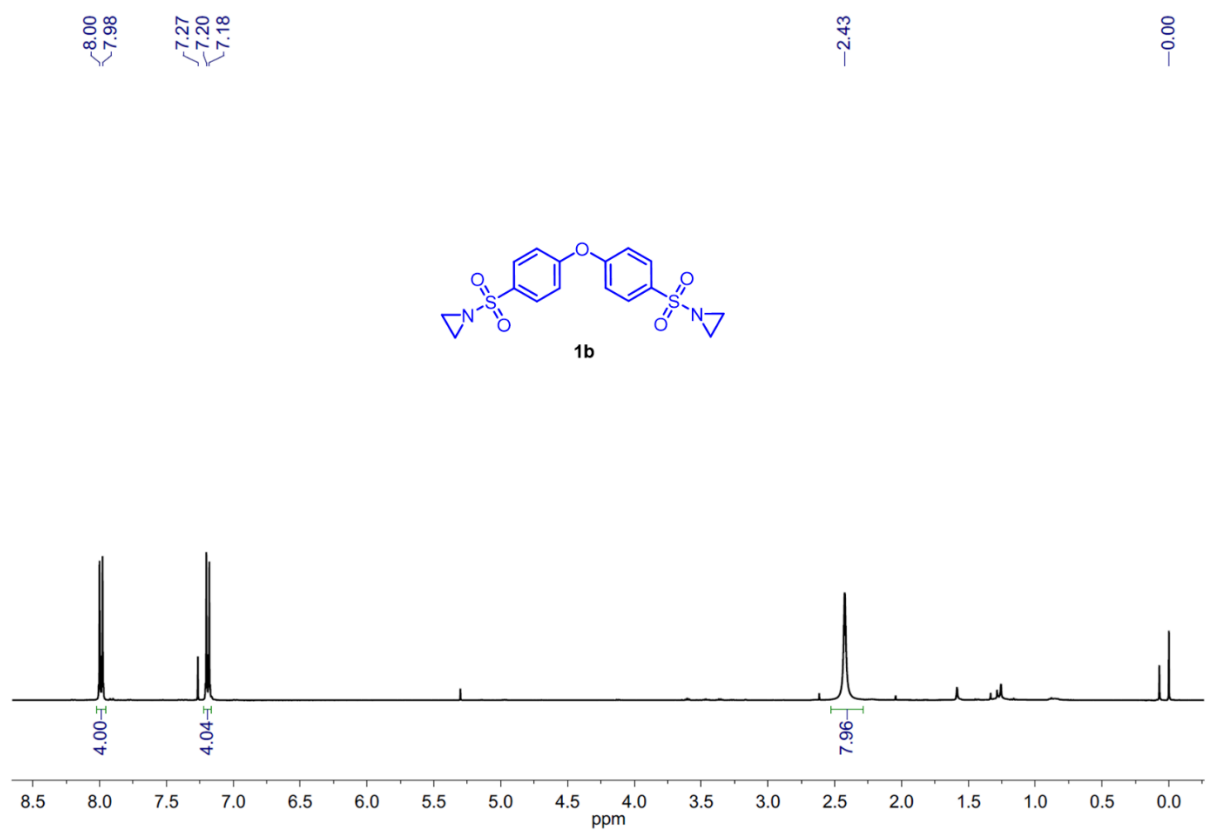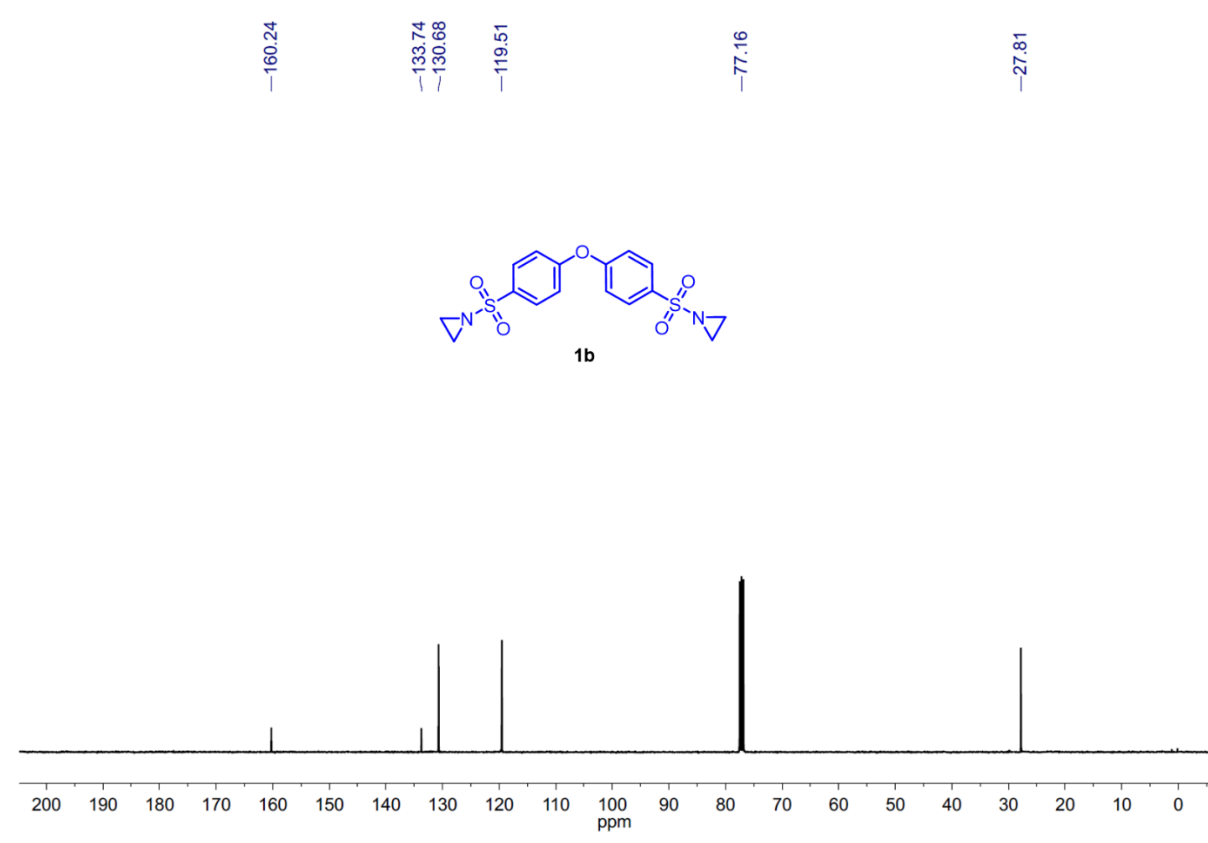

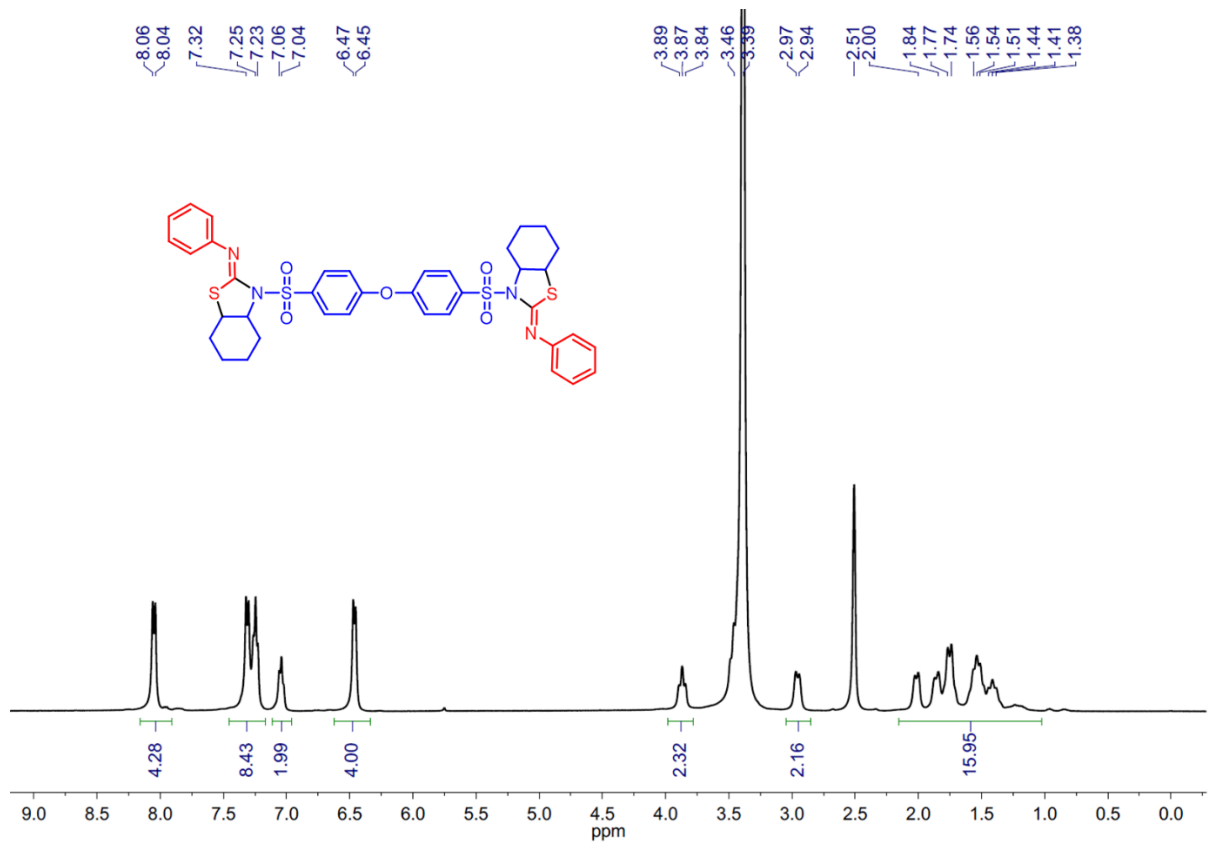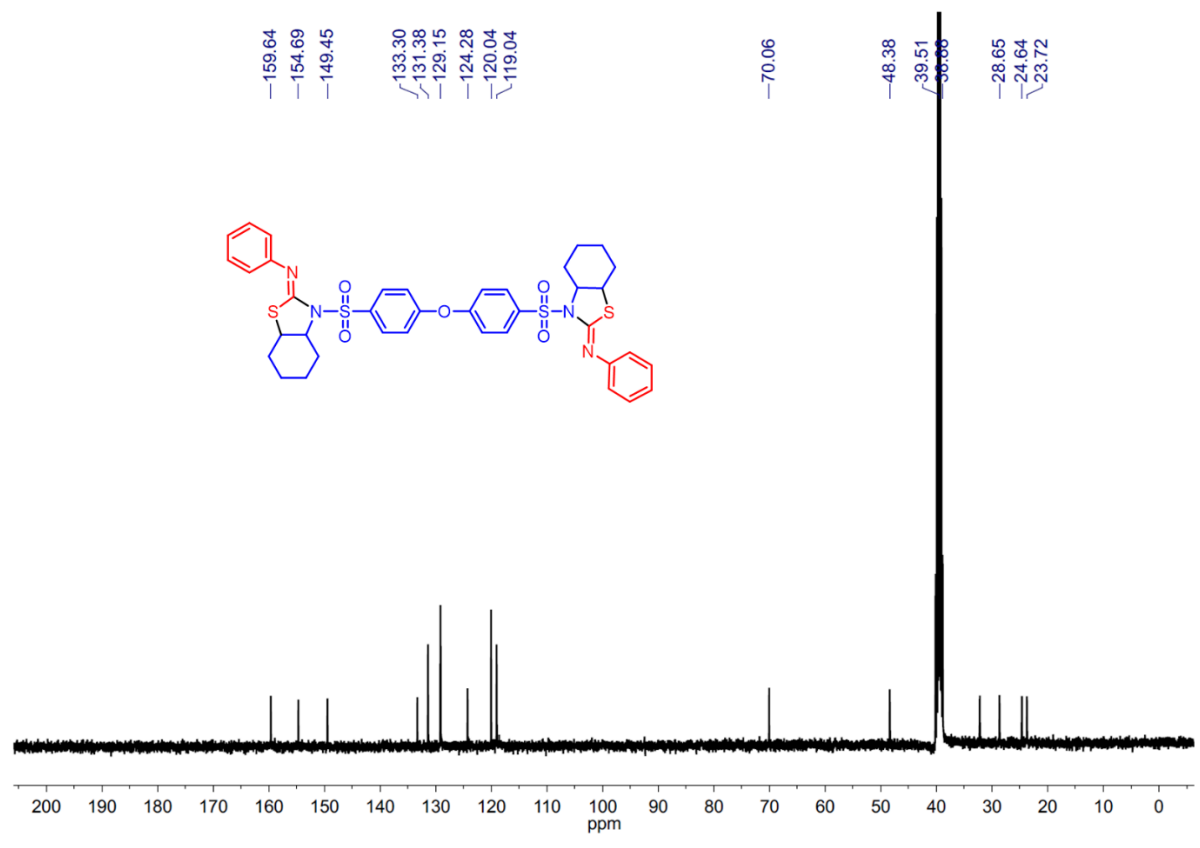

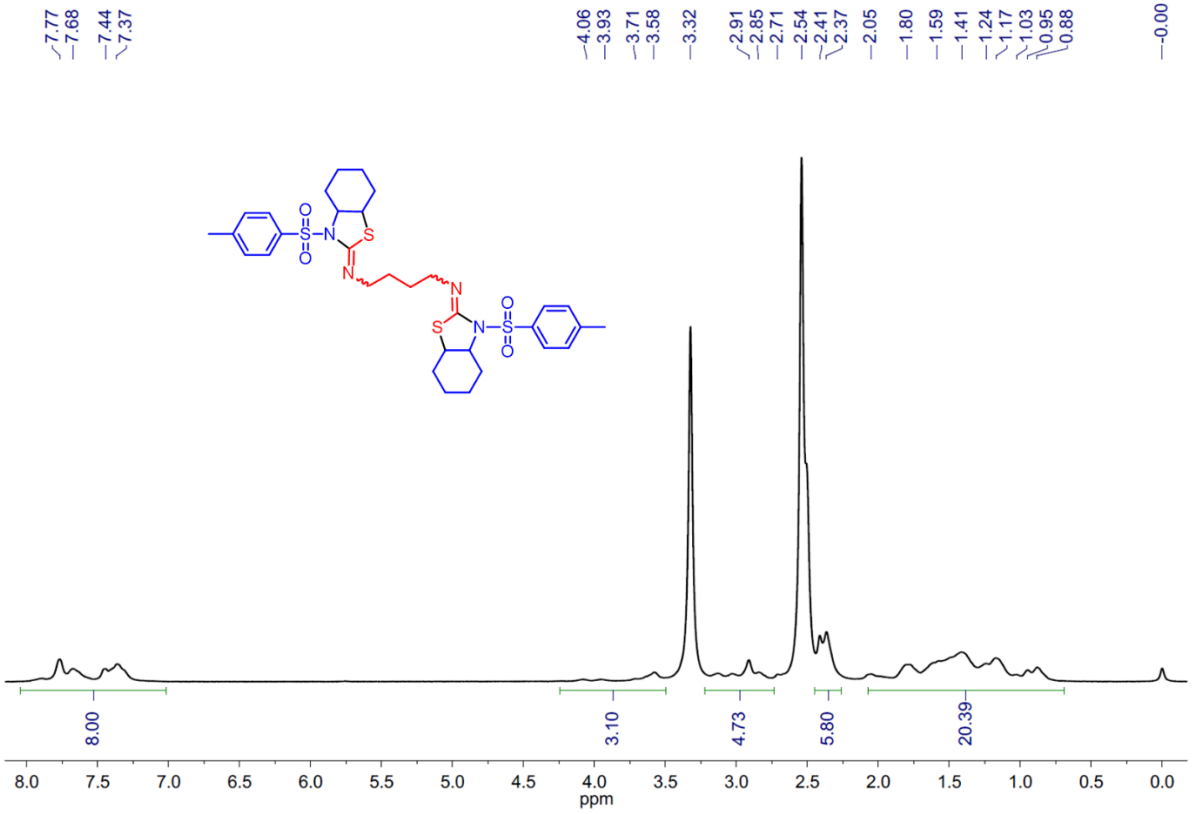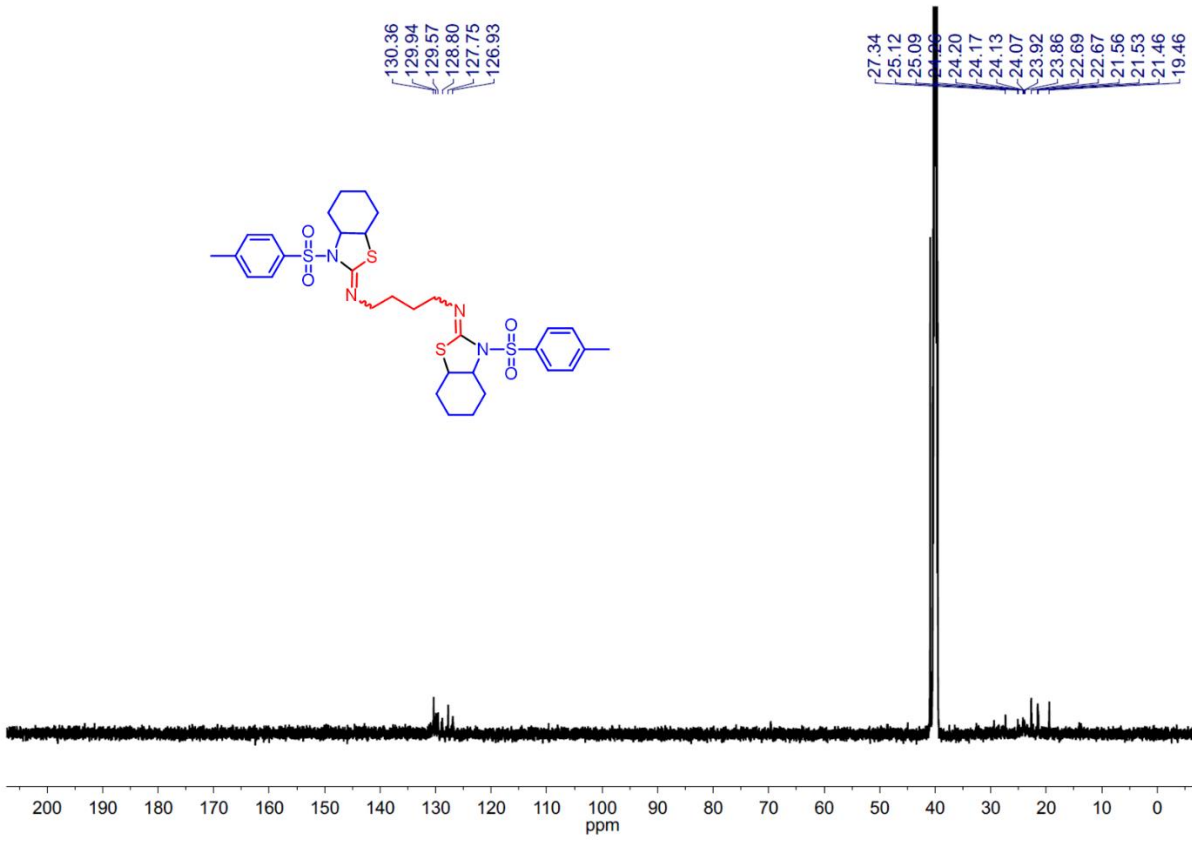



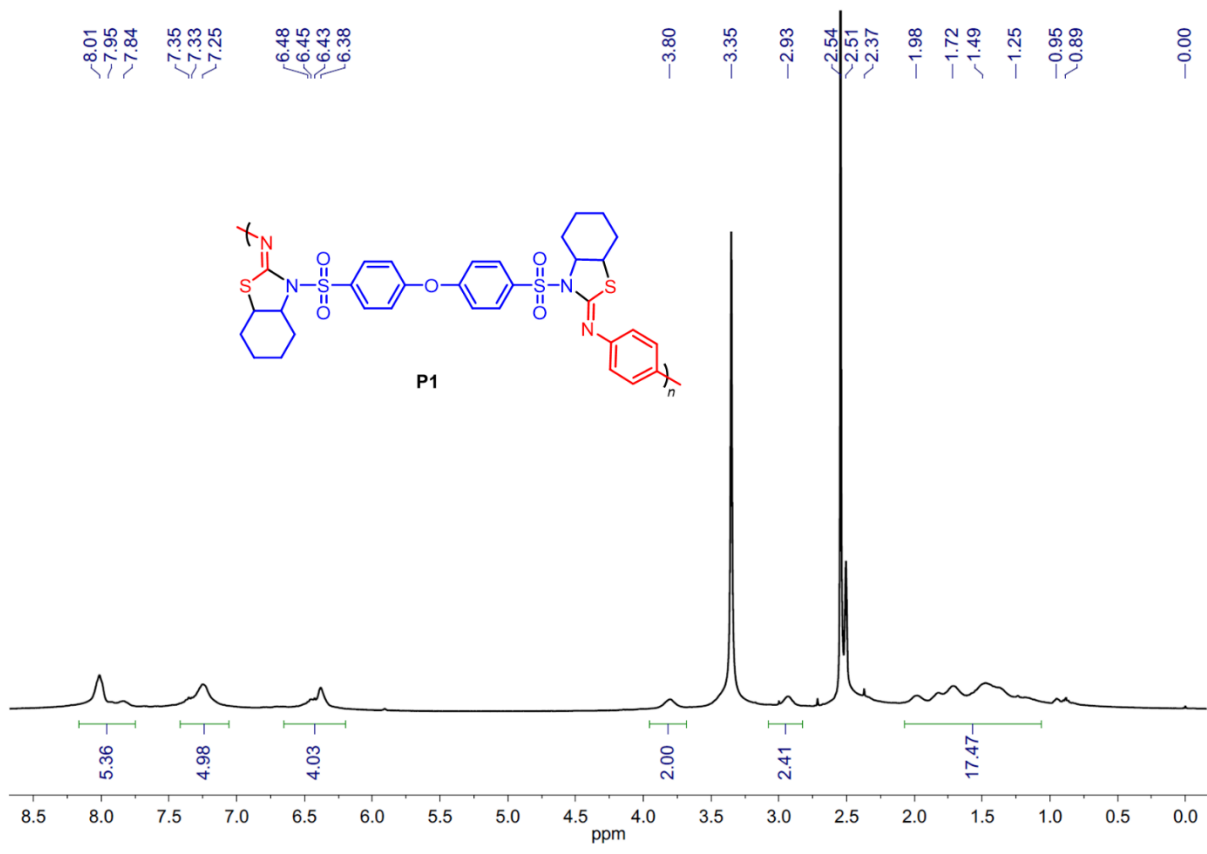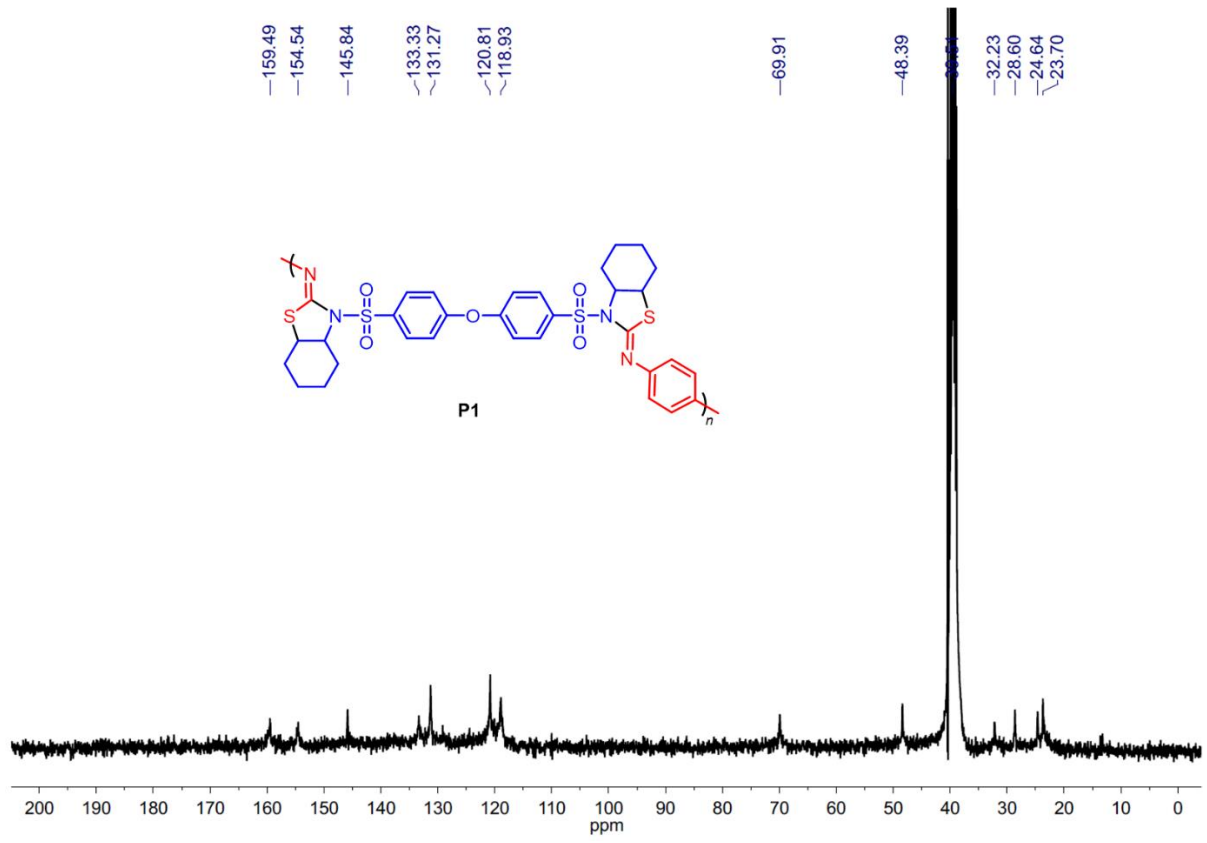

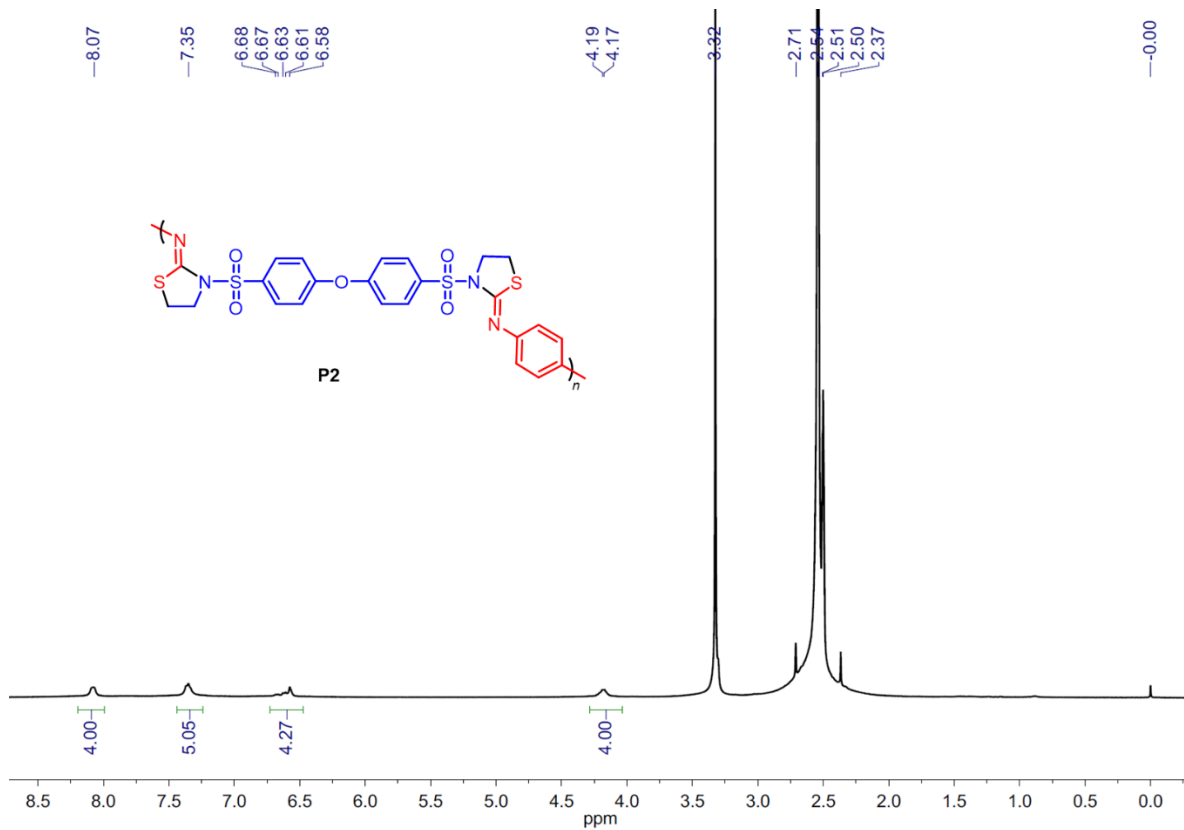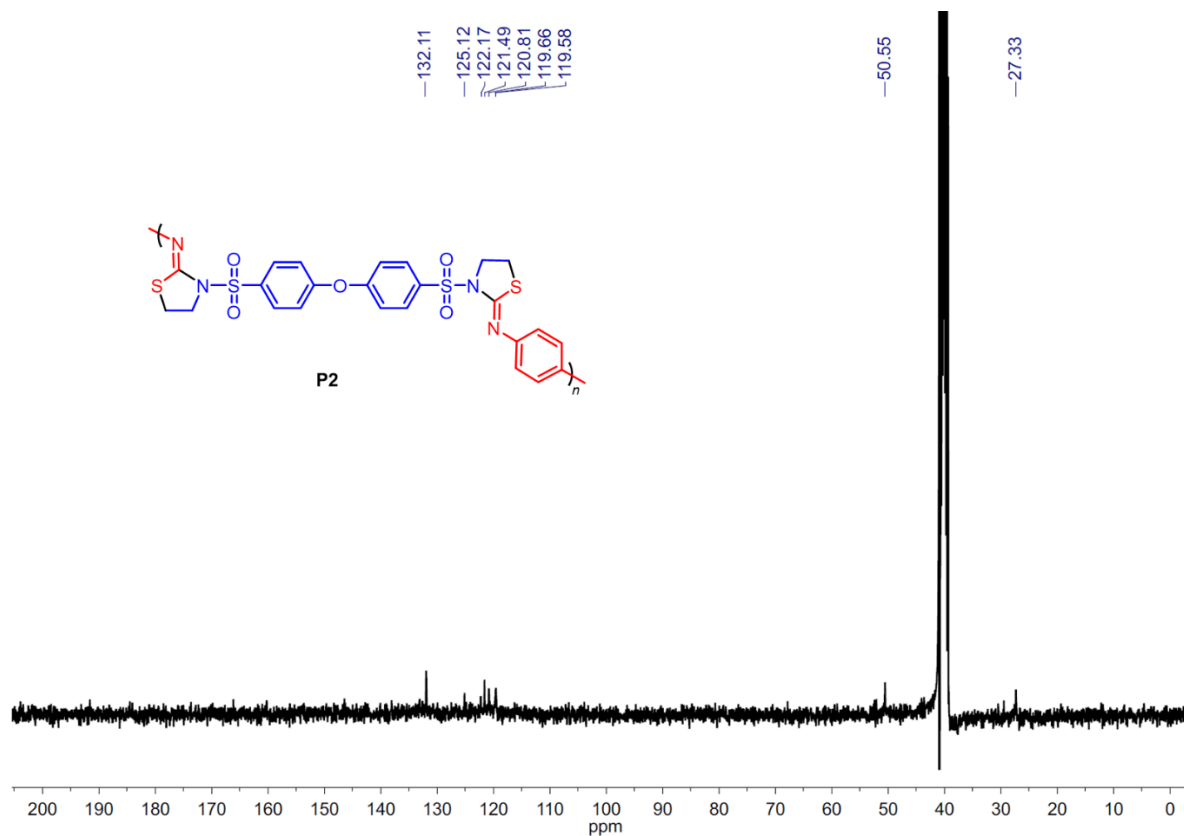

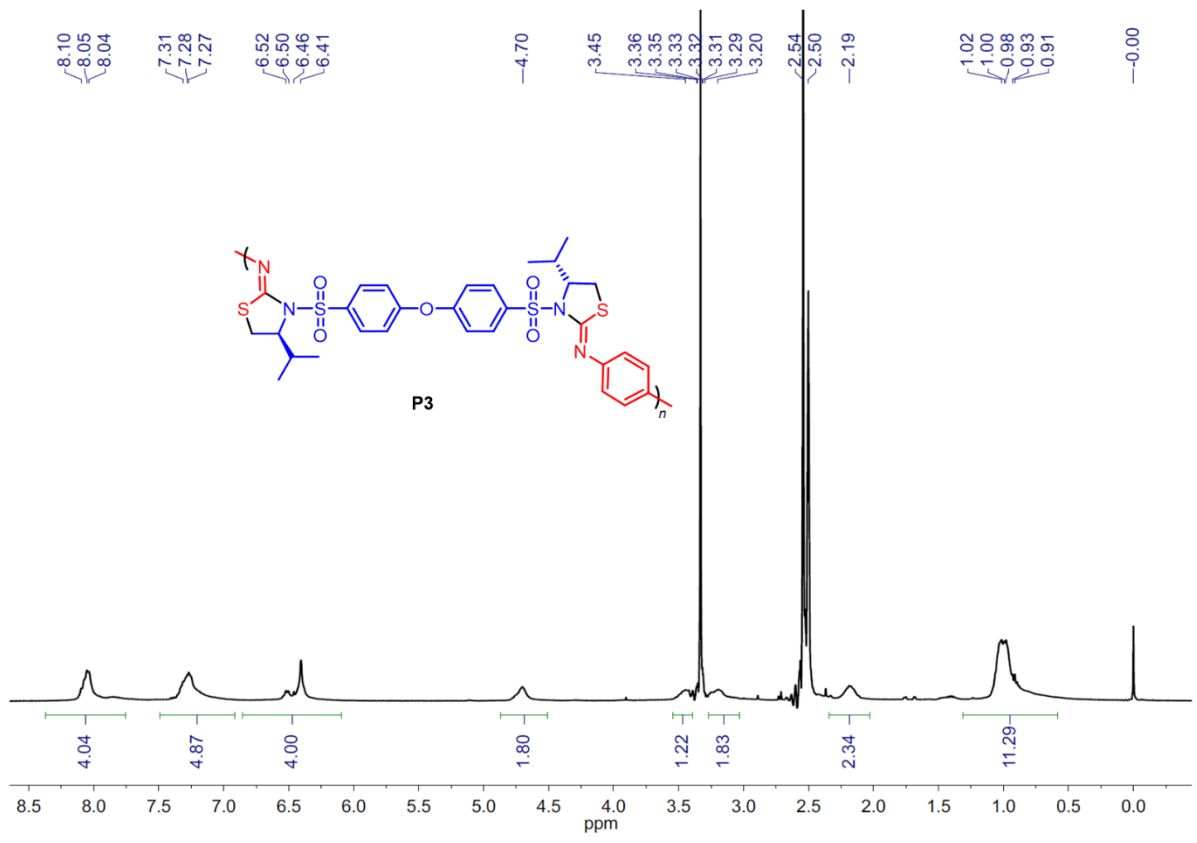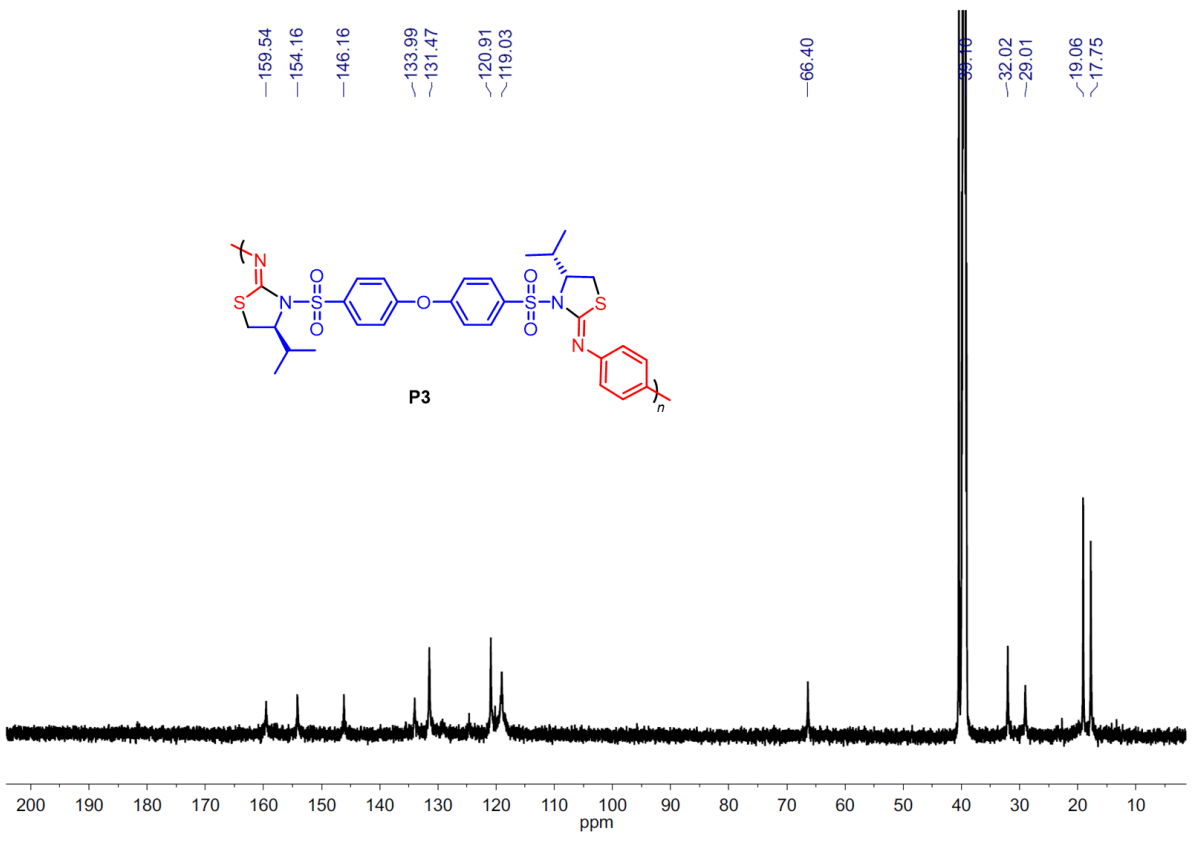

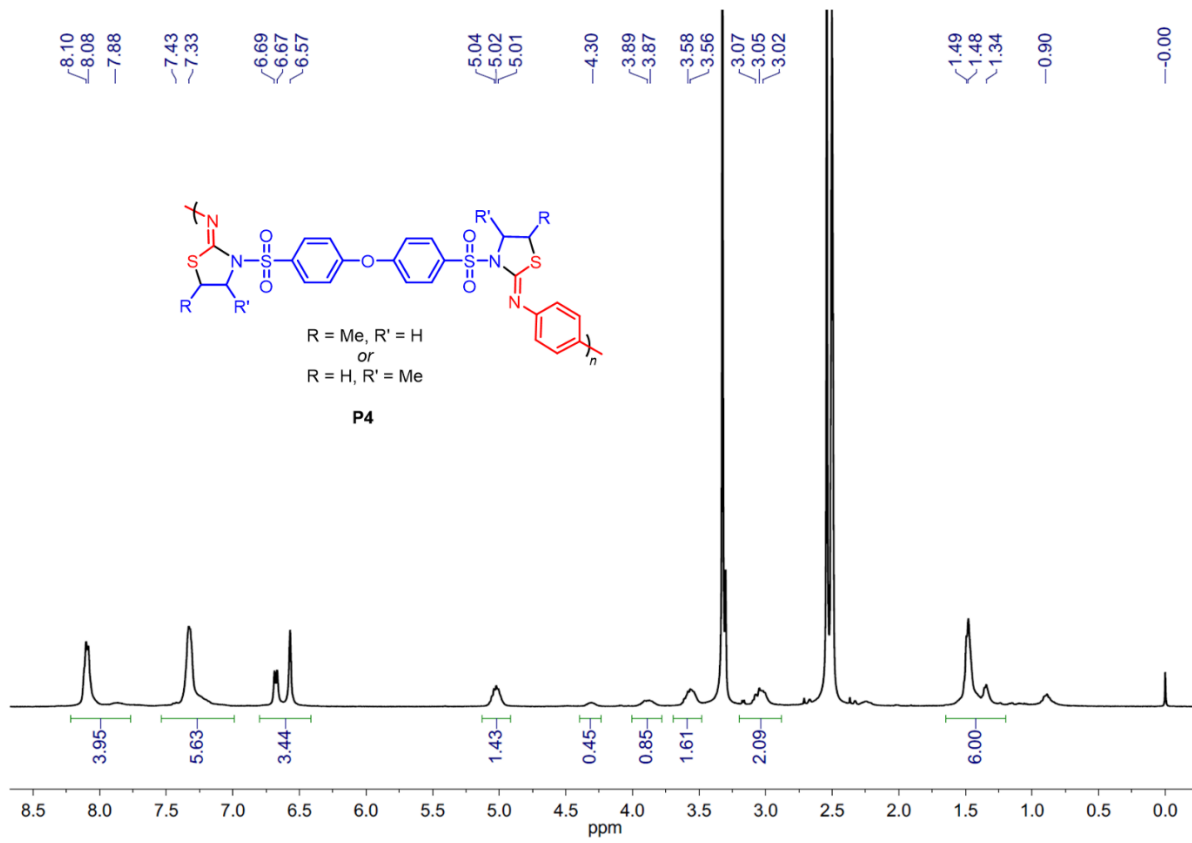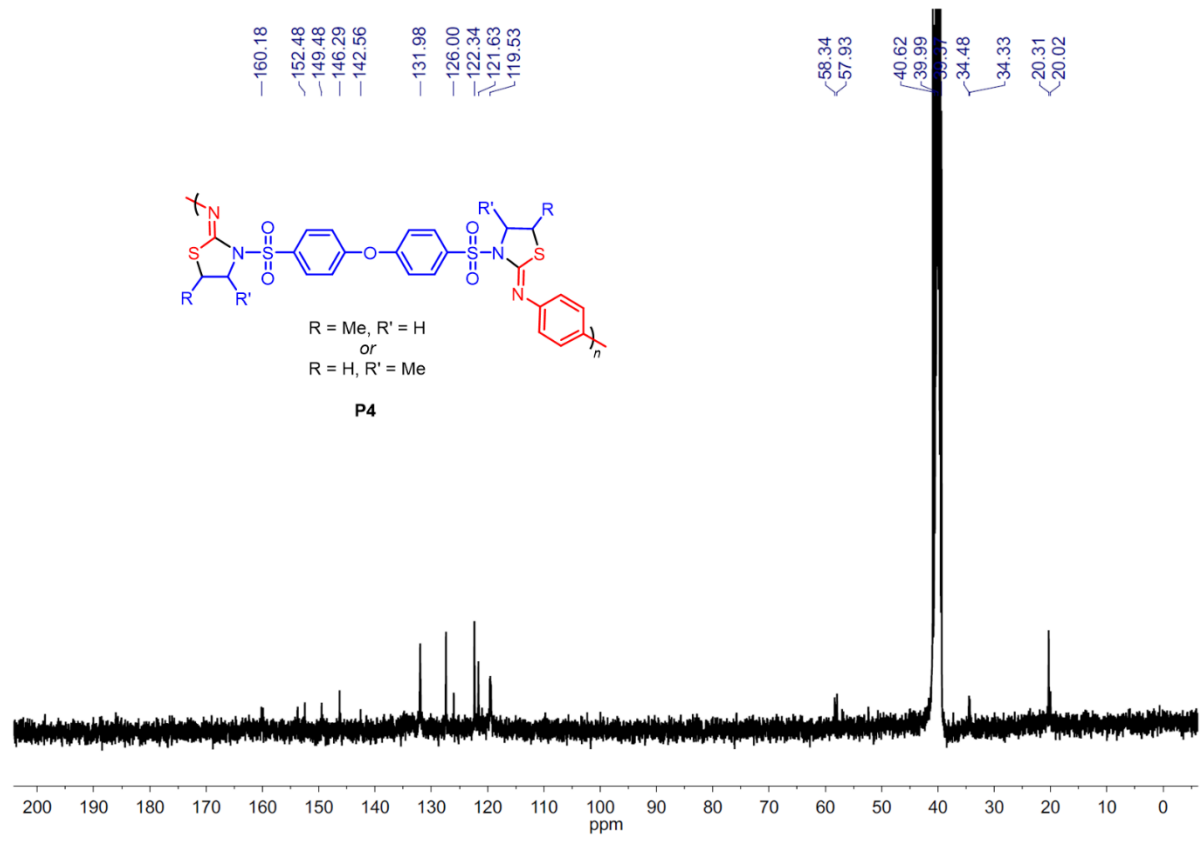

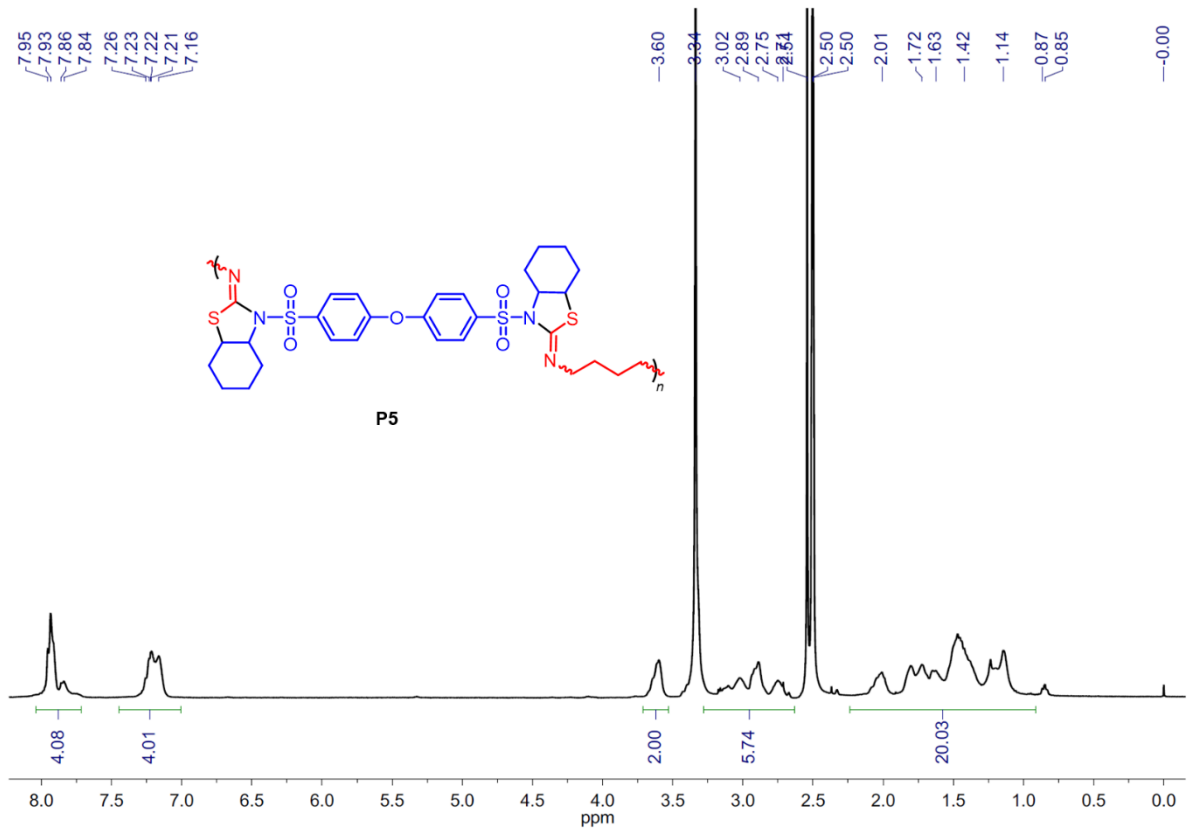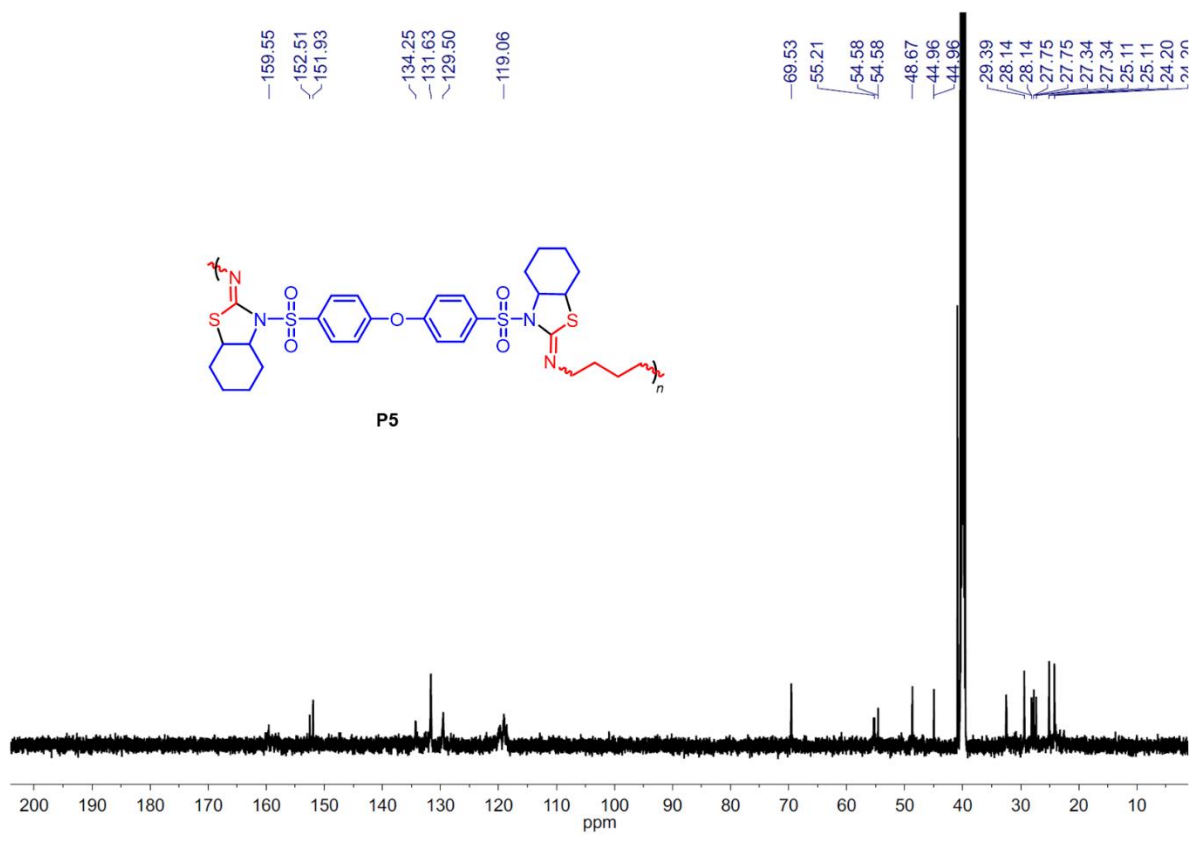

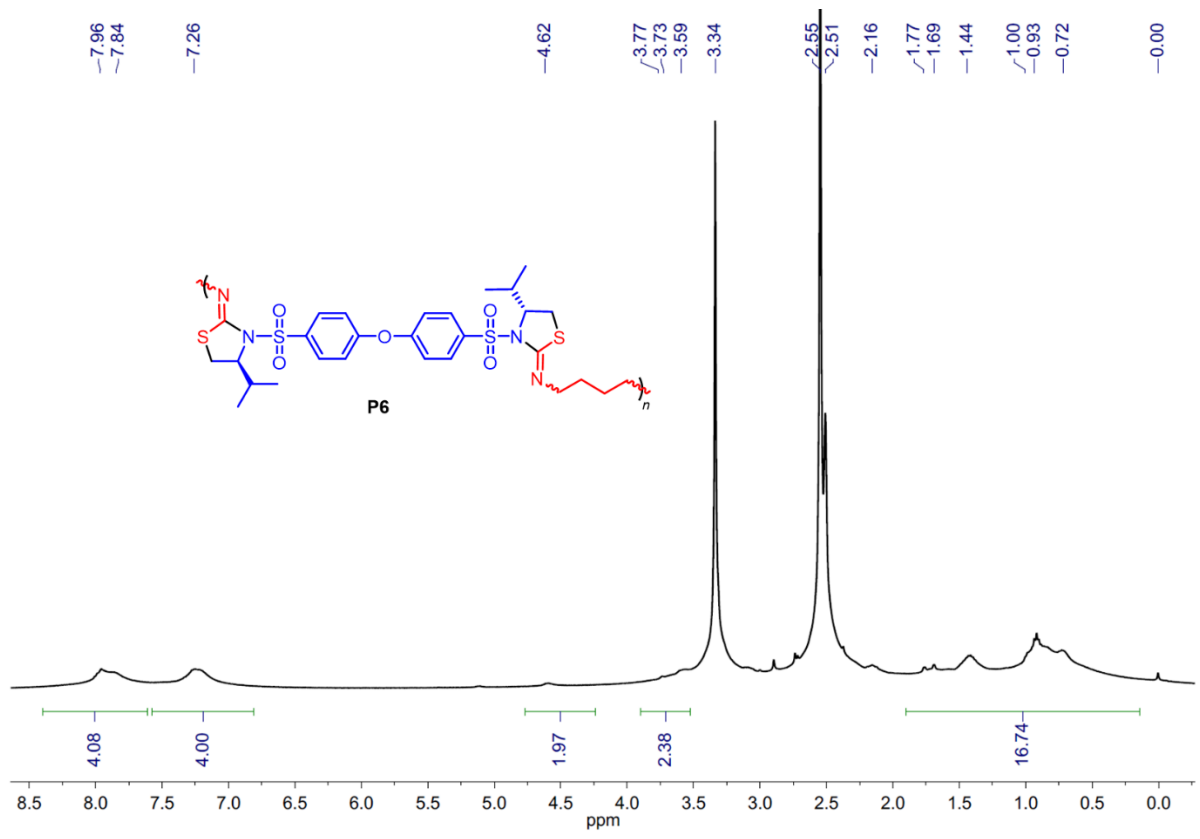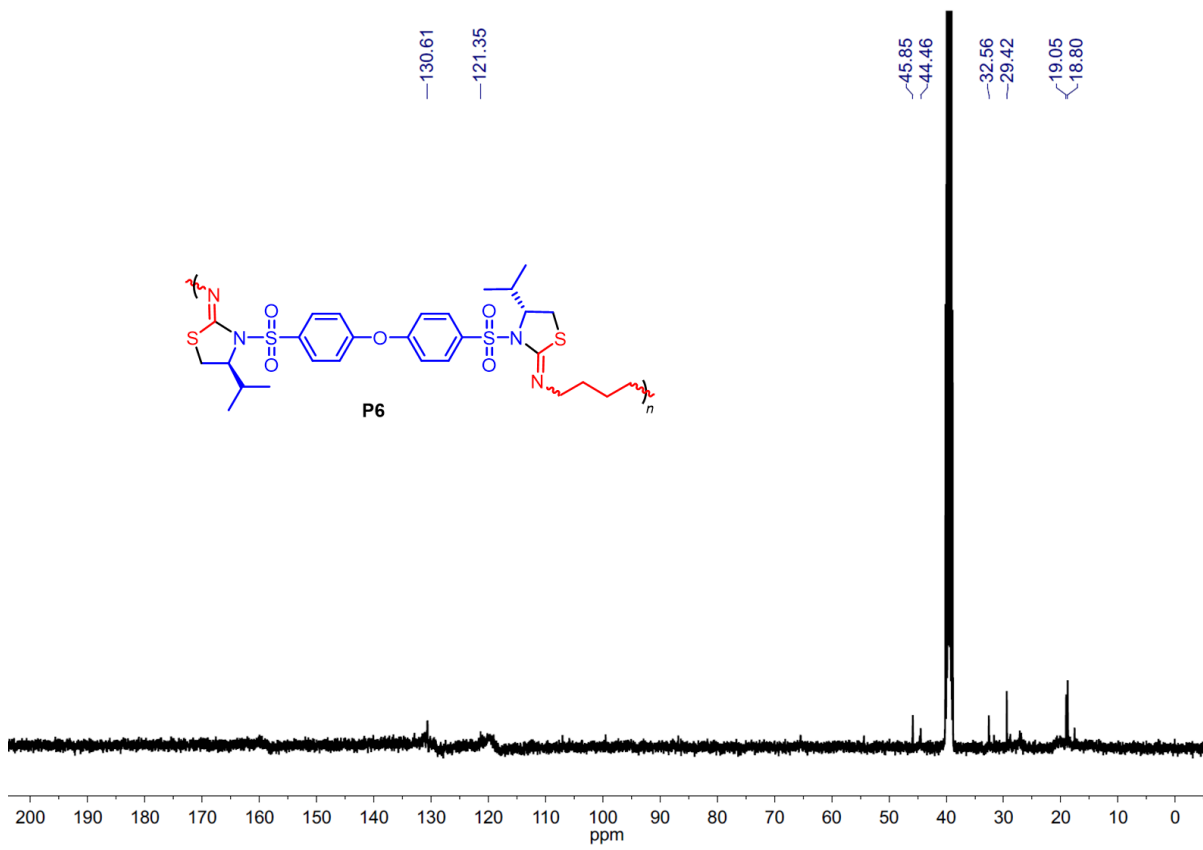

Chromatogram Plot

# P1

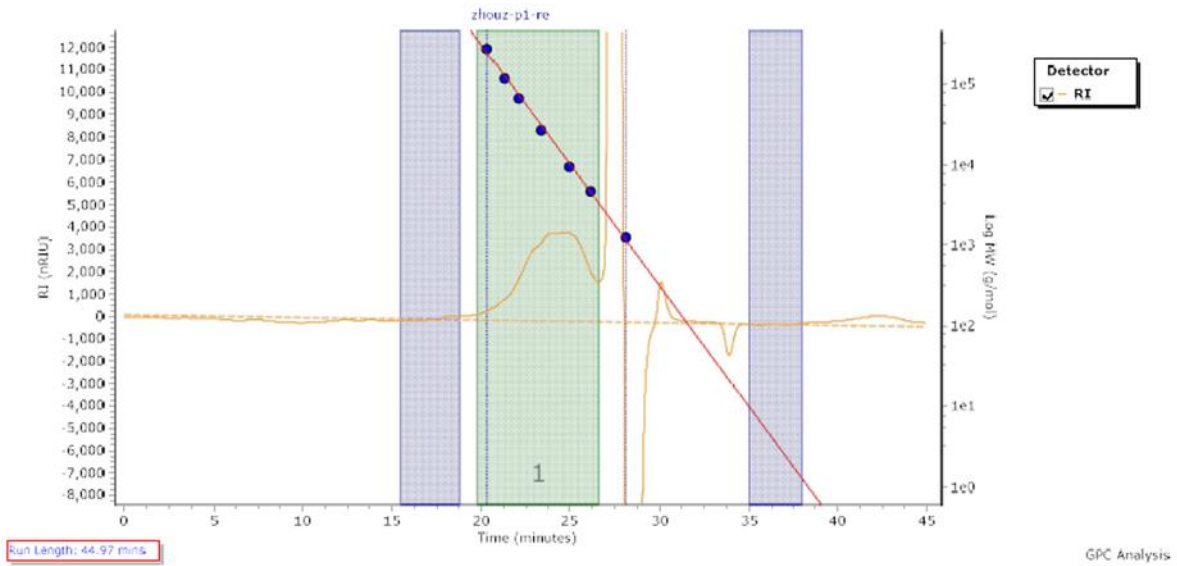

Distribution Plot

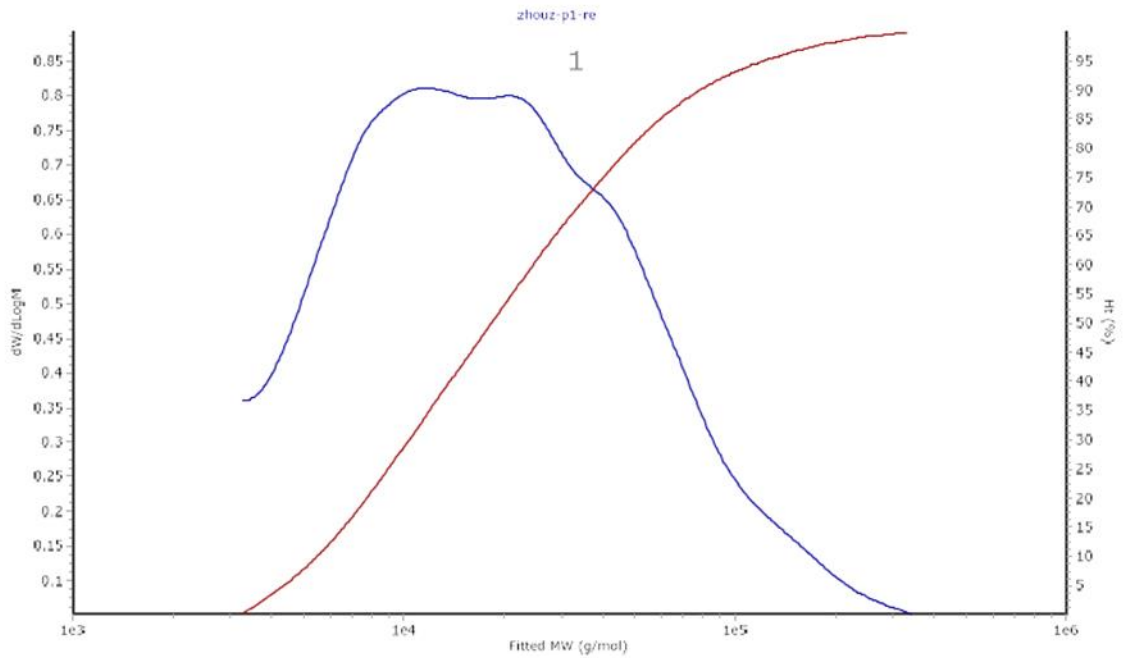

Molecular Weight Averages

| Peak   | Mp (g/mol) | Mn (g/mol) | Mw (g/mol) | Mz (g/mol) | Mz+1 (g/mol) | Mv (g/mol) | PD    |
|--------|------------|------------|------------|------------|--------------|------------|-------|
| Peak 1 | 11527      | 12821      | 34250      | 92782      | 167000       | 82563      | 2.671 |

Peak Information

|                   | Start (mins) | End (mins) |
|-------------------|--------------|------------|
| Baseline region 1 | 15.55833     | 18.87500   |
| Baseline region 2 | 35.04167     | 38.07500   |
| Peak 1            | 19.85000     | 26.61667   |

Peak Trace Information

| Peak   | Trace | Peak Max RT (mins) | Peak Area (mV.s) | Peak Height (mV) |
|--------|-------|--------------------|------------------|------------------|
| Peak 1 | RI    | 24.76667           | 978371.738       | 3962.823         |

Chromatogram Plot

P2

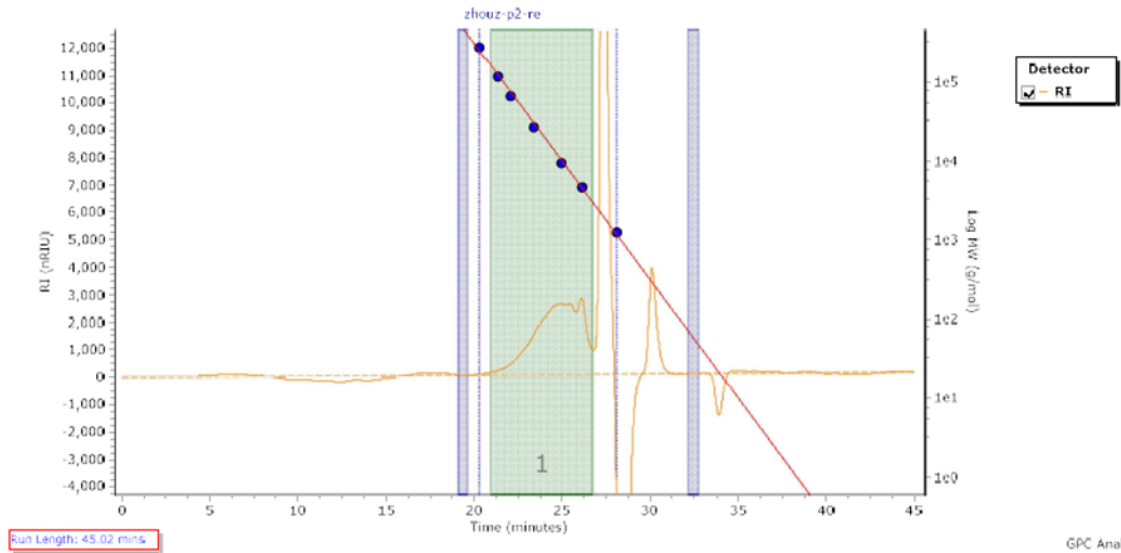

GPC Analysis

Distribution Plot

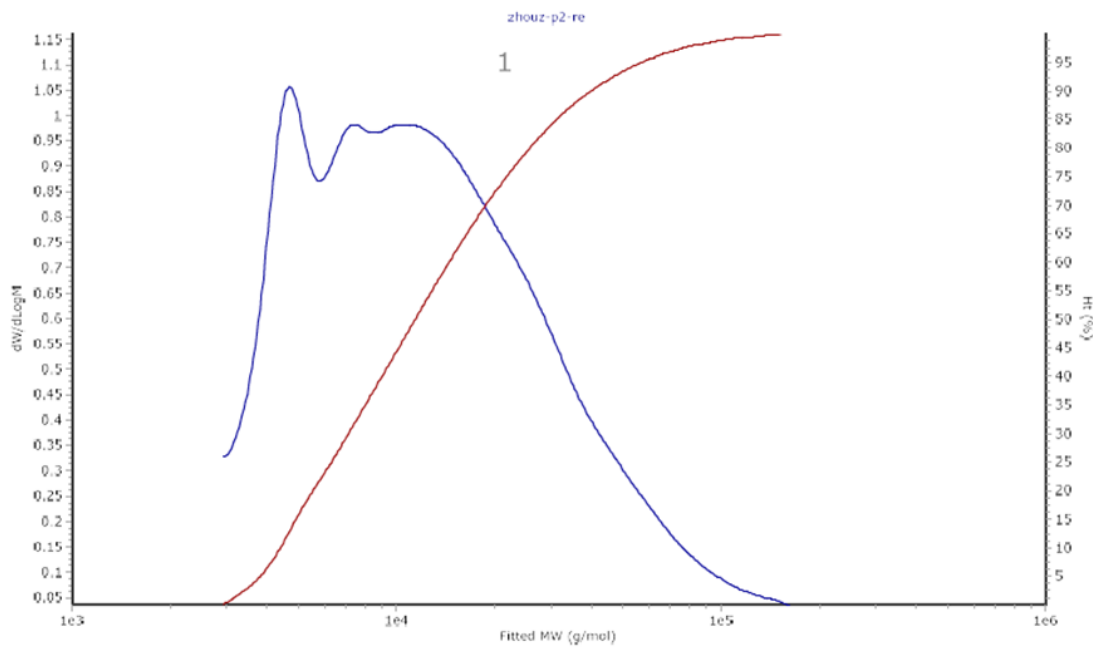

Molecular Weight Averages

| Peak   | Mp (g/mol) | Mn (g/mol) | Mw (g/mol) | Mz (g/mol) | Mz+1 (g/mol) | Mv (g/mol) | PD    |
|--------|------------|------------|------------|------------|--------------|------------|-------|
| Peak 1 | 4672       | 9167       | 18262      | 39929      | 70065        | 36000      | 1.992 |

Peak Information

|                   | Start (mins) | End (mins) |
|-------------------|--------------|------------|
| Baseline region 1 | 19.15833     | 19.74167   |
| Baseline region 2 | 32.16667     | 32.80833   |
| Peak 1            | 20.94167     | 26.76667   |

Peak Trace Information

| Peak   | Trace | Peak Max RT (mins) | Peak Area (mV.s) | Peak Height (mV) |
|--------|-------|--------------------|------------------|------------------|
| Peak 1 | RI    | 26.07500           | 522116.458       | 2752.718         |



Chromatogram Plot

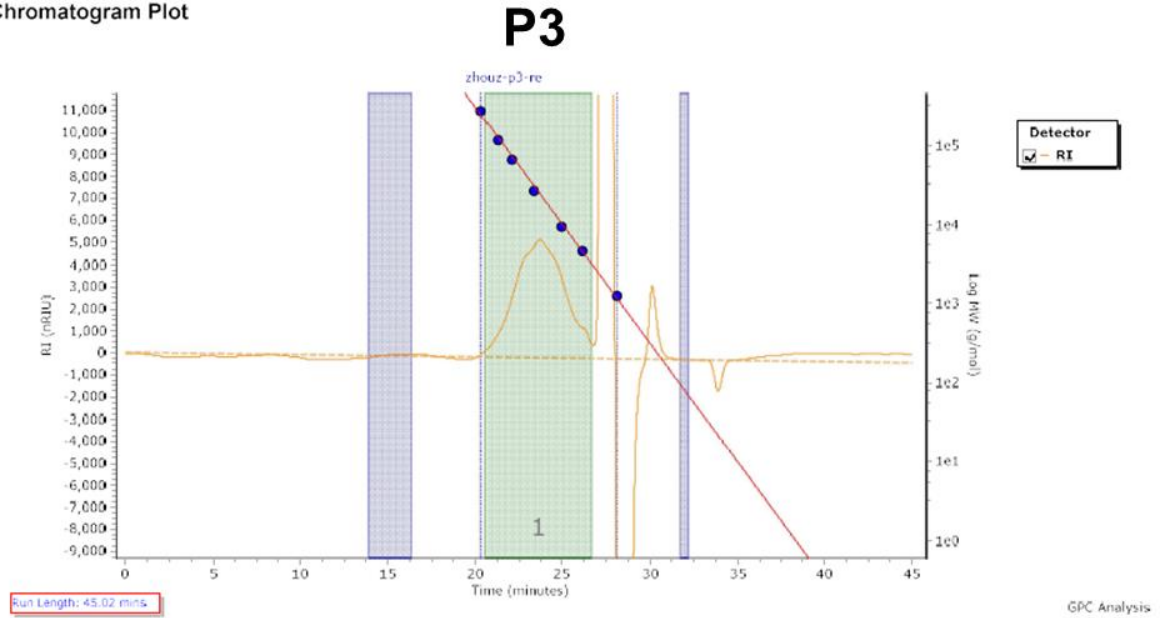

Distribution Plot

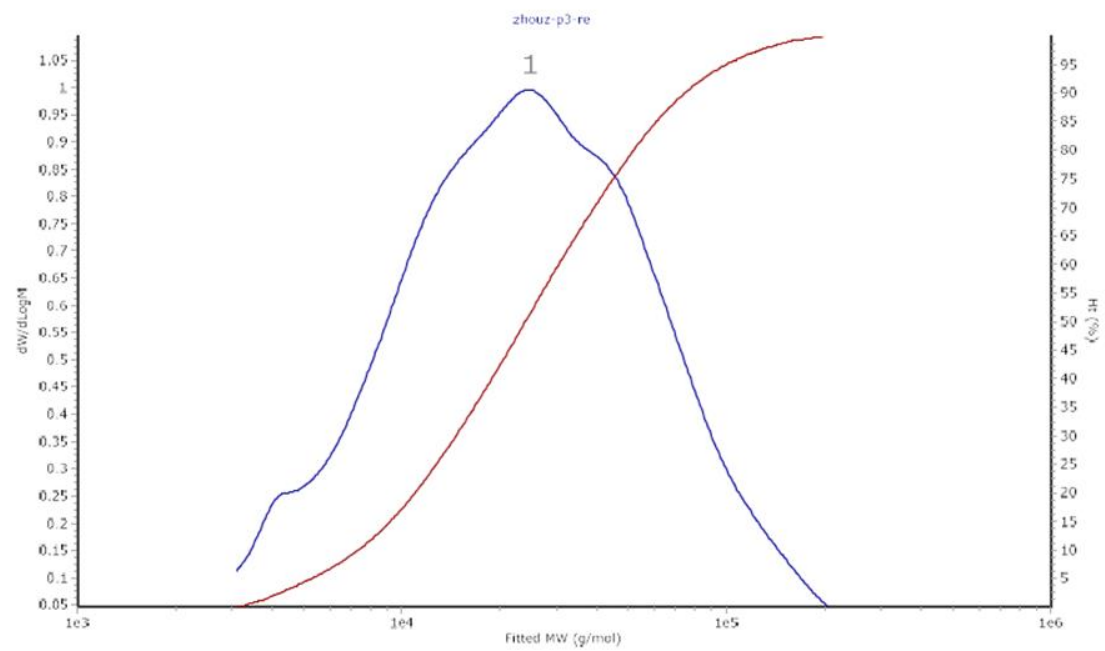

Molecular Weight Averages

| Peak   | Mp (g/mol) | Mn (g/mol) | Mw (g/mol) | Mz (g/mol) | Mz+1 (g/mol) | Mv (g/mol) | PD    |
|--------|------------|------------|------------|------------|--------------|------------|-------|
| Peak 1 | 24628      | 16343      | 34281      | 63284      | 94720        | 58794      | 2.098 |

Peak Information

|                   | Start (mins) | End (mins) |
|-------------------|--------------|------------|
| Baseline region 1 | 13.95833     | 16.48333   |
| Baseline region 2 | 31.70000     | 32.27500   |
| Peak 1            | 20.59167     | 26.69167   |

Peak Trace Information

| Peak   | Trace | Peak Max RT (mins) | Peak Area (mV.s) | Peak Height (mV) |
|--------|-------|--------------------|------------------|------------------|
| Peak 1 | RI    | 23.66667           | 1070403.998      | 5323.044         |

### Chromatogram Plot

# P4

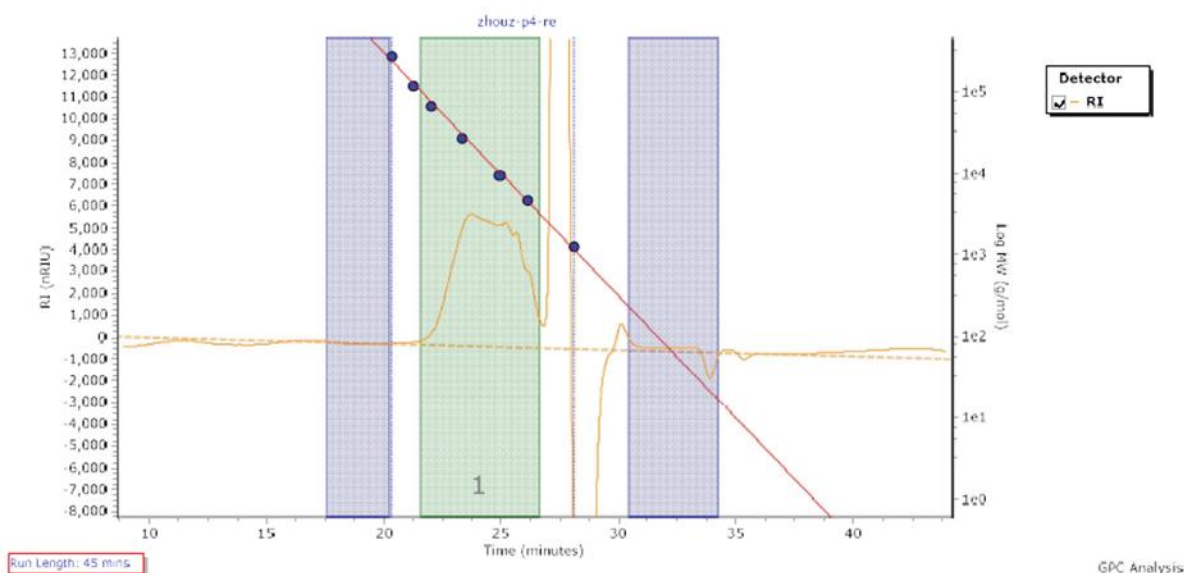

### Distribution Plot

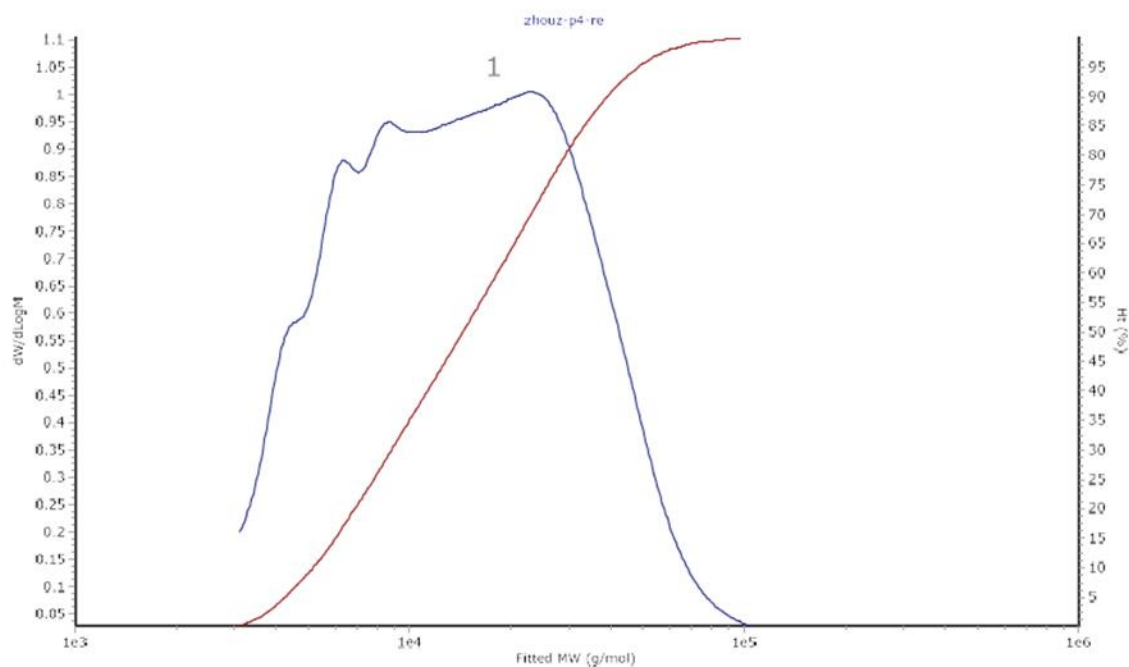

#### Molecular Weight Averages

| Peak   | Mp (g/mol) | Mn (g/mol) | Mw (g/mol) | Mz (g/mol) | Mz+1 (g/mol) | Mv (g/mol) | PD    |
|--------|------------|------------|------------|------------|--------------|------------|-------|
| Peak 1 | 22986      | 10931      | 18994      | 30645      | 42767        | 28898      | 1.738 |

#### Peak Information

|                   | Start (mins) | End (mins) |
|-------------------|--------------|------------|
| Baseline region 1 | 17.55833     | 20.30000   |
| Baseline region 2 | 30.43333     | 34.25833   |
| Peak 1            | 21.56667     | 26.68333   |

#### Peak Trace Information

| Peak   | Trace | Peak Max RT (mins) | Peak Area (mV.s) | Peak Height (mV) |
|--------|-------|--------------------|------------------|------------------|
| Peak 1 | RI    | 23.76667           | 1200180.833      | 6022.847         |

Chromatogram Plot

P5

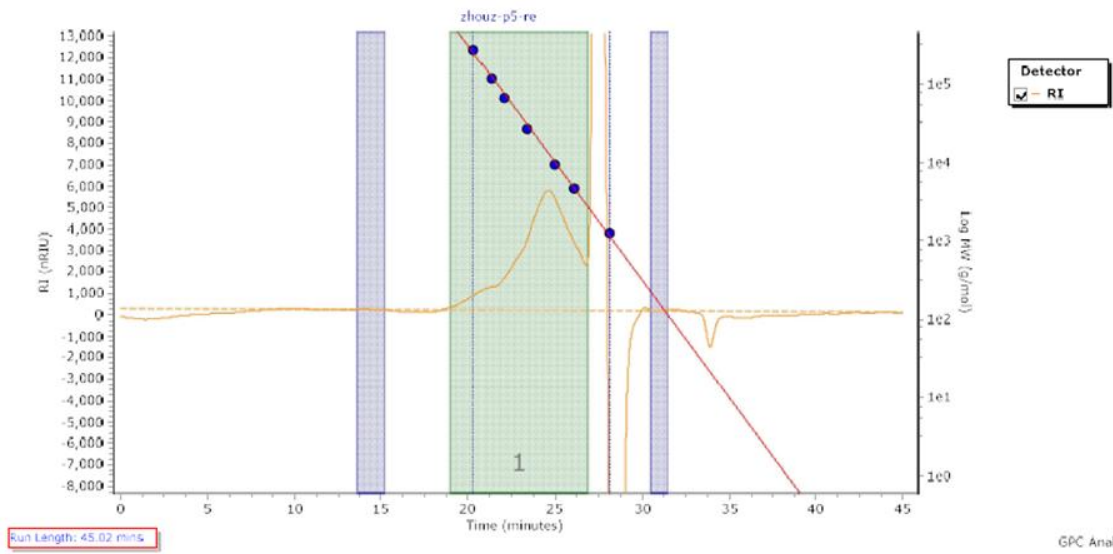

GPC Analysis

Distribution Plot

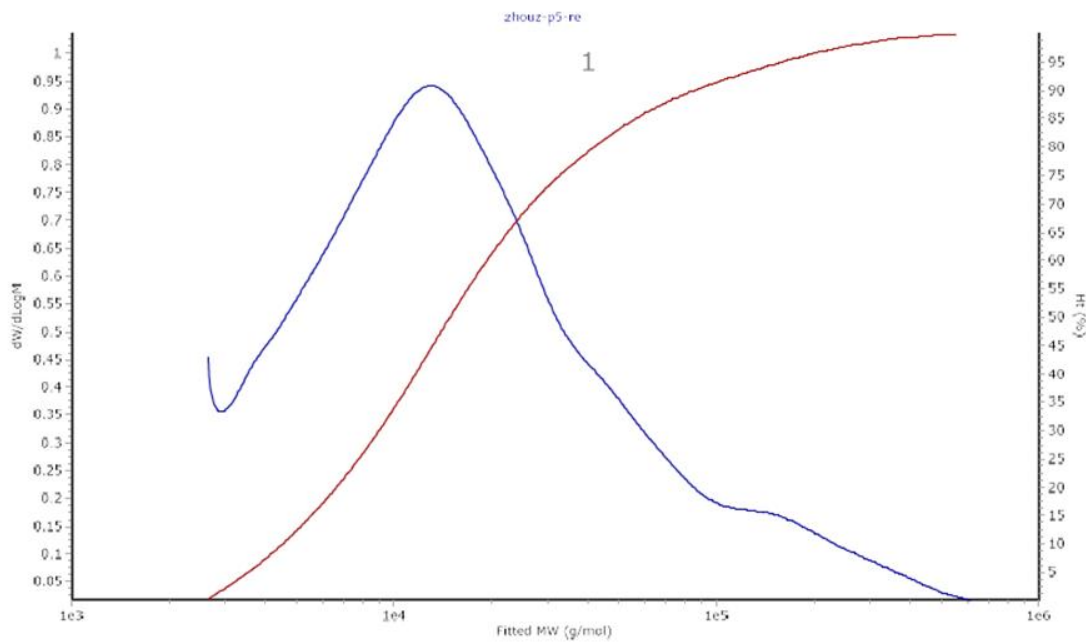

Molecular Weight Averages

| Peak   | Mp (g/mol) | Mn (g/mol) | Mw (g/mol) | Mz (g/mol) | Mz+1 (g/mol) | Mv (g/mol) | PD    |
|--------|------------|------------|------------|------------|--------------|------------|-------|
| Peak 1 | 13006      | 10710      | 36666      | 150299     | 290874       | 129868     | 3.424 |

Peak Information

|                   | Start (mins) | End (mins) |
|-------------------|--------------|------------|
| Baseline region 1 | 13.63333     | 15.32500   |
| Baseline region 2 | 30.47500     | 31.55833   |
| Peak 1            | 19.00000     | 26.91667   |

Peak Trace Information

| Peak   | Trace | Peak Max RT (mins) | Peak Area (mV.s) | Peak Height (mV) |
|--------|-------|--------------------|------------------|------------------|
| Peak 1 | RI    | 24.60000           | 1188274.838      | 5591.342         |

Chromatogram Plot

P6

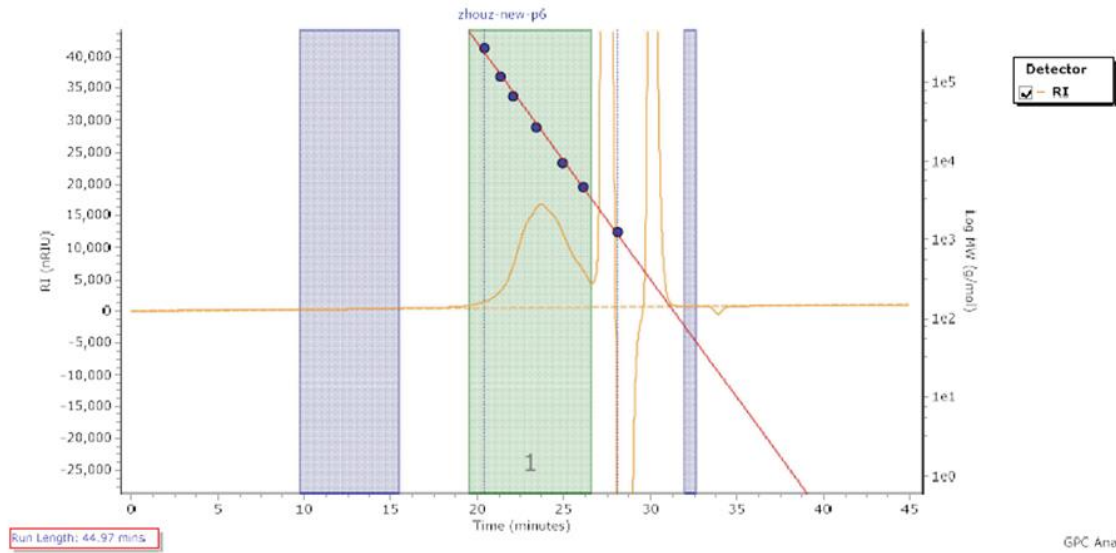

GPC Analysis

Distribution Plot

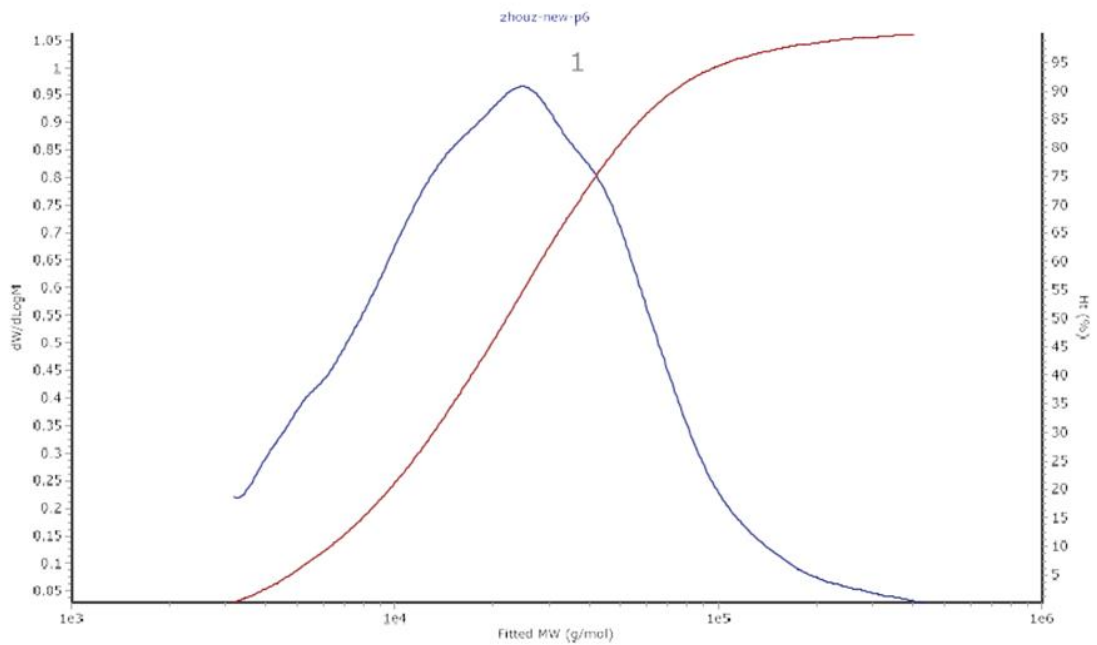

Molecular Weight Averages

| Peak   | Mp (g/mol) | Mn (g/mol) | Mw (g/mol) | Mz (g/mol) | Mz+1 (g/mol) | Mv (g/mol) | PD    |
|--------|------------|------------|------------|------------|--------------|------------|-------|
| Peak 1 | 24770      | 14846      | 35405      | 91101      | 186452       | 79880      | 2.385 |

Peak Information

|                   | Start (mins) | End (mins) |
|-------------------|--------------|------------|
| Baseline region 1 | 9.81667      | 15.60000   |
| Baseline region 2 | 31.98333     | 32.68333   |
| Peak 1            | 19.51667     | 26.65000   |

Peak Trace Information

| Peak   | Trace | Peak Max RT (mins) | Peak Area (mV.s) | Peak Height (mV) |
|--------|-------|--------------------|------------------|------------------|
| Peak 1 | RI    | 23.66667           | 3389098.338      | 16343.035        |
